# Supplementary material for: Identification of three subtypes of triple-negative breast cancer with potential therapeutic implications
Source: Springer Nature journal article supplement (doi:10.1186/s13058-019-1148-6), 2019-05-17
Supplement: MOESM1 [file 16732066]

## Additional file 1: External TNBC and non-TNBC genomic data.

| Study code | DNA chip          | TNBC patients | Non-TNBC patients | Reference |
|------------|-------------------|---------------|-------------------|-----------|
| GSE12276   | Affymetrix U133P2 | 56            | 148               | (S35)     |
| GSE18864   | Affymetrix U133P2 | 35            | 40                | (S36)     |
| GSE19615   | Affymetrix U133P2 | 28            | 87                | (S37)     |
| GSE21653   | Affymetrix U133P2 | 87            | 170               | (S38)     |
| E-MTAB-365 | Affymetrix U133P2 | 51            | 449               | (S39)     |
|            |                   | <b>257</b>    | <b>894</b>        |           |

## References

S35. Bos PD, Zhang XH, Nadal C, Shu W, Gomis RR, Nguyen DX et al. Genes that mediate breast cancer metastasis to the brain. *Nature*. 2009;459:1005-9.

S36. Silver DP, Richardson AL, Eklund AC, Wang ZC, Szallasi Z, Li Q et al. Efficacy of neoadjuvant Cisplatin in triple-negative breast cancer. *J Clin Oncol*. 2010;28:1145-53.

S37. Li Y, Zou L, Li Q, Haibe-Kains B, Tian R, Li Y et al. Amplification of LAPTM4B and YWHAZ contributes to chemotherapy resistance and recurrence of breast cancer. *Nat Med*. 2010;16:214-8.

S38. Sabatier R, Finetti P, Cervera N, Lambaudie E, Esterni B, Mamessier E et al. A gene expression signature identifies two prognostic subgroups of basal breast cancer. *Breast Cancer Res Treat*. 2011;126:407-20.

S39. Guedj M, Marisa L, de Reynies A, Orsetti B, Schiappa R, Bibeau F et al. A refined molecular taxonomy of breast cancer. *Oncogene*. 2011;31:1196-206.
