# Supplementary material for: Identification of three subtypes of triple-negative breast cancer with potential therapeutic implications
Source: Springer Nature journal article supplement (doi:10.1186/s13058-019-1148-6), 2019-05-17
Supplement: MOESM2 [file 16732066]

**Additional file 2: GES list, characteristics, bioinformatics and references.**

| <b>N°</b>                                     | <b>GES name</b>    | <b>n genes</b> | <b>n probes</b> | <b>Statistics</b>                                   | <b>References</b> |
|-----------------------------------------------|--------------------|----------------|-----------------|-----------------------------------------------------|-------------------|
| <b>Molecular subtyping</b>                    |                    |                |                 |                                                     |                   |
| 1                                             | 4-TNBC             | 80             | -               | Nearest centroid classifier                         | (S1)              |
| 2                                             | AR                 | 36             | -               | Weighted average expression                         | (S2)              |
| 3                                             | Basal-like         | -              | 37              | Average expression                                  | (S3)              |
| 4                                             | CIT                | -              | 375             | Nearest centroid classifier                         | (S4)              |
| 5                                             | Claudin-CD24       | -              | 19              | Average expression                                  | (S3)              |
| 6                                             | Claudin-low        | 807            | -               | Nearest centroid classifier                         | (S5)              |
| 7                                             | ER                 | -              | 135             | Weighted average expression                         | (S6)              |
| 8                                             | ER-negative        | 813            | -               | Nearest centroid classifier                         | (S7)              |
| 9                                             | ERBB2              | -              | 4               | Weighted average expression                         | (S6)              |
| 10                                            | Molecular-apocrine | -              | 27              | Average expression                                  | (S3)              |
| 11                                            | PAM50              | 50             | -               | Nearest centroid classifier                         | (S8)              |
| 12                                            | TNBCtype           | 2188           | -               | Nearest centroid classifier                         | (S9)              |
| <b>Immune response</b>                        |                    |                |                 |                                                     |                   |
| 13                                            | B-cell             | -              | 48              | Average expression                                  | (S3)              |
| 14                                            | CIBERSORT          | 547            | -               | v-support vector regression with linear kernel      | (S10)             |
| 15                                            | CYT                | -              | 2               | Average expression                                  | (S11)             |
| 16                                            | IL-8               | -              | 4               | Average expression                                  | (S3)              |
| 17                                            | M2/M1              | 649            | -               | Weighted average expression                         | (S12)             |
| 18                                            | M2/M1 (Becker)     | 164            | -               | Weighted average expression                         | (S13)             |
| 19                                            | MHC-1              | -              | 17              | Average expression                                  | (S3)              |
| 20                                            | MHC-2              | -              | 14              | Average expression                                  | (S3)              |
| 21                                            | STAT1              | -              | 14              | Average expression                                  | (S14)             |
| 22                                            | T-cell             | -              | 27              | Average expression                                  | (S3)              |
| 23                                            | Type I IFN         | -              | 14              | Average expression                                  | (S3)              |
| <b>Microenvironment cells</b>                 |                    |                |                 |                                                     |                   |
| 24                                            | Epithelial cells   | 207            | -               | Single-sample gene set enrichment analysis (ssGSEA) | (S15)             |
| 25                                            | Fibroblasts        | 189            | -               | Single-sample gene set enrichment analysis (ssGSEA) | (S15)             |
| 26                                            | Neurons            | 219            | -               | Single-sample gene set enrichment analysis (ssGSEA) | (S15)             |
| <b>Metabolisms</b>                            |                    |                |                 |                                                     |                   |
| 27                                            | Adipocytes         | -              | 8               | Average expression                                  | (S3)              |
| 28                                            | Glycolysis         | 6              | -               | Average expression                                  | (S16)             |
| 29                                            | IRGS               | -              | 19              | Weighted average expression                         | (S17)             |
| <b>Critical biological pathways in cancer</b> |                    |                |                 |                                                     |                   |
| 30                                            | AKT                | 379            | -               | Weighted average expression                         | (S18)             |
| 31                                            | $\beta$ -Catenin   | -              | 98              | Weighted average expression                         | (S19)             |
| 32                                            | CIN                | 25             | -               | Average expression                                  | (S20)             |
| 33                                            | E2F3               | -              | 298             | Weighted average expression                         | (S19)             |
| 34                                            | EGFR               | 27             | -               | Average expression                                  | (S21)             |
| 35                                            | HOXA               | -              | 8               | Average expression                                  | (S3)              |
| 36                                            | MITO/OXPPOS        | 38             | -               | average expression                                  | (S22)             |
| 37                                            | MYC                | -              | 248             | Weighted average expression                         | (S19)             |
| 38                                            | p53                | -              | 32              | Weighted average expression                         | (S23)             |
| 39                                            | PIK3CA             | -              | 278             | Weighted average expression                         | (S24)             |
| 40                                            | PNI                | -              | 24              | Weighted average expression                         | (S25)             |
| 41                                            | PRL                | 75             | -               | Average expression                                  | (S26)             |
| 42                                            | Proliferation      | -              | 47              | Average expression                                  | (S3)              |
| 43                                            | PTEN loss          | 246            | -               | Weighted average expression                         | (S27)             |
| 44                                            | RAS                | -              | 348             | Weighted average expression                         | (S19)             |
| 45                                            | Reactive stroma    | -              | 47              | Average expression                                  | (S3)              |
| 46                                            | SRC                | -              | 73              | Weighted average expression                         | (S19)             |
| 47                                            | Stroma-CD10        | 12             | -               | Weighted average expression                         | (S28)             |
| 48                                            | TGF $\beta$        | -              | 55              | Weighted average expression                         | (S29)             |
| 49                                            | VEGF               | -              | 7               | Average expression                                  | (S3)              |
| 50                                            | Wound-response     | 459            | -               | Weighted average expression                         | (S30)             |
| 51                                            | YAP1-WWTR1         | 24             | -               | Average expression                                  | (S31)             |
| <b>Prognosis</b>                              |                    |                |                 |                                                     |                   |
| 52                                            | 38-GES             | 38             | -               | Weighted average expression                         | (S32)             |
| 53                                            | 70-GES             | 70             | -               | Nearest centroid classifier                         | (S33)             |
| 54                                            | GGI                | -              | 128             | Weighted average expression                         | (S34)             |

## References

- S1. Burstein MD, Tsimelzon A, Poage GM, Covington KR, Contreras A, Fuqua SA et al. Comprehensive genomic analysis identifies novel subtypes and targets of triple-negative breast cancer. *Clin Cancer Res.* 2015;21:1688-98.
- S2. Naderi A. Coagulation factor VII is regulated by androgen receptor in breast cancer. *Exp Cell Res.* 2015; 331:239-50.
- S3. Karn T, Pusztai L, Holtrich U, Iwamoto T, Shiang CY, Schmidt M et al. Homogeneous datasets of triple negative breast cancers enable the identification of novel prognostic and predictive signatures. *PLoS One.* 2011;6:e28403.
- S4. Guedj M, Marisa L, de Reynies A, Orsetti B, Schiappa R, Bibeau F et al. A refined molecular taxonomy of breast cancer. *Oncogene.* 2012;31:1196-206.
- S5. Prat A, Parker JS, Karginova O, Fan C, Livasy C, Herschkowitz JI et al. Phenotypic and molecular characterization of the claudin-low intrinsic subtype of breast cancer. *Breast Cancer Res.* 2010;12:R68.
- S6. Wolf DM, Lenburg ME, Yau C, Boudreau A, van't Veer LJ. Gene co-expression modules as clinically relevant hallmarks of breast cancer diversity. *PLoS One.* 2014;9:e88309.
- S7. Teschendorff AE, Miremadi A, Pinder SE, Ellis IO, Caldas C. An immune response module identifies a good prognosis subtype in estrogen negative breast cancer. *Genome Biol.* 2007;8:R157.
- S8. Sorlie T, Tibshirani R, Parker J, Hasties T, Marron JS, Nobel A et al. Repeated observation of breast tumor subtypes in independent gene expression data sets. *Proc Natl Acad Sci USA.* 2003;100:8418-23.
- S9. Lehmann BD, Bauer JA, Chen X, Sanders ME, Chakravarthy AB, Shyr Y et al. Identification of human triple-negative breast cancer subtypes and preclinical models for selection of targeted therapies. *J Clin Invest.* 2011;121:2750-67.
- S10. Newman AM, Liu CL, Green MR, Gentles AJ, Feng W, Xu Y et al. Robust enumeration of cell subsets from tissue expression profiles. *Nat Methods.* 2015;12:453-57.
- S11. Rooney M, Shukla SA, Wu CJ, Getz G, Hacohen N: Molecular and genetic properties of tumors associated with local immune cytolytic activity. *Cell.* 2015;160:48-61.
- S12. Jézéquel P, Loussouarn D, Guérin-Charbonnel C, Campion L, Vanier A, Gouraud W et al. Gene-expression molecular subtyping of triple-negative breast cancer tumours: importance of immune response. *Breast Cancer Res.* 2015;17:43.
- S13. Becker M, De Bastiani MA, Parisi MM, Guma FT, Markoski MM, Castro MA et al. Integrated Transcriptomics Establish Macrophage Polarization Signatures and have Potential Applications for Clinical Health and Disease. *Sci Rep.* 2015;5:13351.
- S14. Rody A, Holtrich U, Pusztai L, Liedtke C, Gaetje R, Ruckhaeberle E et al. T-cell metagene predicts a favorable prognosis in estrogen receptor-negative and HER2-positive breast cancers. *Breast Cancer Res.* 2009;11:R15.
- S15. Aran D, Hu Z, Butte AJ. xCell: Digitally portraying the tissue cellular heterogeneity landscape. *Genome Biol.* 2017;18:220.
- S16. Hu Z, Fan C, Livasy C, He X, Oh DS, Ewend MG et al. A compact VEGF signature associated with distant metastases and poor outcomes. *BMC Med.* 2009;7:9.
- S17. Miller LD, Coffman LG, Chou JW, Black MA, Bergh J, D'Agostino R Jr et al. An iron regulatory gene signature predicts outcome in breast cancer. *Cancer Res.* 2011;71:6728-37.
- S18. Majumder PK, Febbo PG, Bikoff R, Berger R, Xue Q, McMahon LM et al. mTOR inhibition reverses Akt-dependent prostate intraepithelial neoplasia through regulation of apoptotic and HIF-1-dependent pathways. *Nat Med.* 2004;10:594-601.
- S19. Bild AH, Yao G, Chang JT, Wang Q, Potti A, Chasse D et al. Oncogenic pathway signatures in human cancers as a guide to targeted therapies. *Nature.* 2006;439:353-7.
- S20. Carter SL, Eklund AC, Kohane IS, Harris LN, Szallasi Z. A signature of chromosomal instability inferred from gene expression profiles predicts clinical outcome in multiple human cancers. *Nat Genet.* 2006;9:1043-8.

- S21. Hoadley KA, Weigman VJ, Fan C, Sawyer LR, He X, Troester MA et al. EGFR associated expression profiles vary with breast tumor subtype. *BMC Genomics*. 2007;8:258.
- S22. Whitaker-Menezes D, Martinez-Outschoorn UE, Flomenberg N, Birbe RC, Witkiewicz AK, Howell A et al. Hyperactivation of oxidative mitochondrial metabolism in epithelial cancer cells in situ: visualizing the therapeutic effects of metformin in tumor tissue. *Cell Cycle*. 2011;23:4047-64.
- S23. Miller LD, Smeds J, George J, Vega VB, Vergara L, Ploner A et al. An expression signature for p53 status in human breast cancer predicts mutations status, transcriptional effects, and patients survival. *Proc Natl Acad Sci USA*. 2005;102:13550-5.
- S24. Loi S, Haibe-Kains B, Majjaj S, Lallemand F, Durbecq V, Larsimont D et al. PIK3CA mutations associated with gene signature of low mTORC1 signaling and better outcomes in estrogen receptor-positive breast cancer. *Proc Natl Acad Sci USA*. 2010;107:10208-13.
- S25. Mays AC, Chou J, Craddock AL, Miller L, Browne JD. Gene Variability Between Perineural-positive and Perineural-negative Squamous Cell Skin Cancers. *Anticancer Res*. 2016;36:4007-11.
- S26. Sato T, Tran TH, Peck AR, Liu C, Ertel A, Lin J et al. Global profiling of prolactin-modulated transcripts in breast cancer in vivo. *Mol Cancer*. 2013;12:59.
- S27. Saal LH, Johansson P, Holm K, Gruvberger-Saal SK, She QB, Maurer M et al. Poor prognosis in carcinoma is associated with a gene expression signature of aberrant PTEN tumor suppressor pathway activity. *Proc Natl Acad Sci USA*. 2007;104:7564-9.
- S28. Desmedt C, Majjaj S, Kheddoumi N, Singhal SK, Haibe-Kains B, El Ouriaghli F et al. Characterization and clinical evaluation of CD10+ stroma cells in the breast cancer microenvironment. *Clin Cancer Res*. 2012;18:1004-14.
- S29. Padua D, Zhang XH, Wang Q, Nadal C, Gerald WL, Gomis RR et al. TGFbeta primes breast tumors for lung metastasis seeding through angiopoietin-like 4. *Cell*. 2008;133: 66-77.
- S30. Chang HY, Sneddon JB, Alizadeh AA, Sood R, West RB, Montgomery K et al. Gene expression signature of fibroblast serum response predicts human cancer progression: similarities between tumors and wounds. *PLoS Biol*. 2004;2:E7.
- S31. Subramanian A, Tamayo P, Mootha VK, Mukherjee S, Ebert BL, Gillette MA et al. Gene set enrichment analysis: A knowledge-based approach for interpreting genome-wide expression profiles. *Proc Natl Acad Sci USA*. 2005;102:15545-50.
- S32. Jézéquel P, Campone M, Roché H, Gouraud W, Charbonnel C, Ricolleau G et al. A 38-gene expression signature to predict metastasis risk in node-positive cancer after systemic adjuvant chemotherapy: a genomic substudy of PACS01 clinical trial. *Breast Cancer Res Treat*. 2009;116:509-20.
- S33. van 't Veer LJ, Dai H, van de Vijver MJ, He YD, Hart AA, Mao M et al. Gene expression profiling predicts clinical outcome of breast cancer. *Nature*. 2002;415:530-6.
- S34. Sotiriou C, Wirapati P, Loi S, Harris A, Fox S, Smeds J et al. Gene expression profiling in breast cancer: understanding the molecular basis of histologic grade to improve prognosis. *J Natl Cancer Inst*. 2006;98:262-72.
