# Supplementary material for: Identification of three subtypes of triple-negative breast cancer with potential therapeutic implications
Source: Springer Nature journal article supplement (doi:10.1186/s13058-019-1148-6), 2019-05-17
Supplement: MOESM3 [file 16732066]

**Additional file 3: Details of antibodies used for immunohistochemistry.**

| <b>Target</b>    | <b>Clone</b> | <b>Dilution</b> | <b>Antigen retrieval</b> | <b>Supplier</b> |
|------------------|--------------|-----------------|--------------------------|-----------------|
| CD20             | L26          | Prediluted      | CC1 Ventana (pH 8.4)     | Ventana         |
| CD21             | 2G9          | Prediluted      | CC1 Ventana (pH 8.4)     | Ventana         |
| CD138/syndecan-1 | B-A38        | Prediluted      | CC1 Ventana (pH 8.4)     | Ventana         |
| MECA79           | MECA79       | 1/200           | CC1 Ventana (pH 8.4)     | Santa Cruz      |
| UCHL1/PGP9.5     | Polyclonal   | 1/400           | CC1 Ventana (pH 8.4)     | Abcam           |
| S100             | Polyclonal   | Prediluted      | None                     | Ventana         |
