# Supplementary material for: Identification of three subtypes of triple-negative breast cancer with potential therapeutic implications
Source: Springer Nature journal article supplement (doi:10.1186/s13058-019-1148-6), 2019-05-17

**Additional file 4: Projection of internal TNBC cohorts in the first PCA plane. (A)** PACS08 patients (n = 131, [orange]) compared to TNBC patients of a previous study (n = 107, [black]). **(B)** Each color represents a recruitment site, except for greyish pale green color, which represents one or two patients recruited in different sites (n = 36 patients; 28 sites). Total number of recruitment sites was equal to 45.

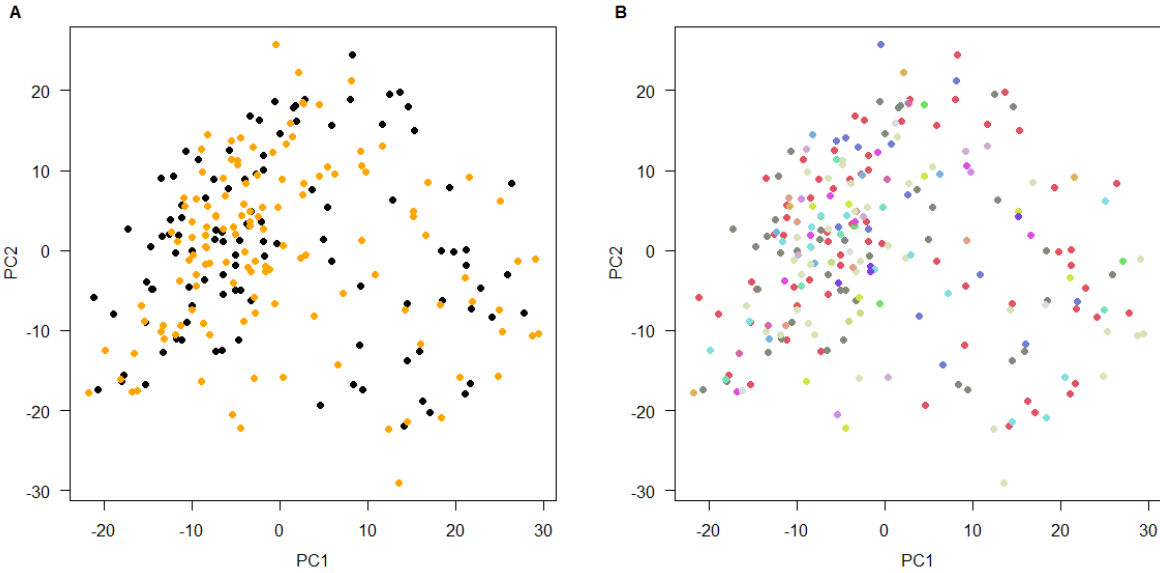

Supplement: MOESM4 [file 16732066]
