# Supplementary material for: Identification of three subtypes of triple-negative breast cancer with potential therapeutic implications
Source: Springer Nature journal article supplement (doi:10.1186/s13058-019-1148-6), 2019-05-17

**Additional file 5: Fuzzy clustering of 238 TNBC.** Distribution of patients based on probability of belonging to cluster: C1, n = 55 (blue); C2, n = 98 (red) and C3, n = 85 (green). Each vertex of the triangle represents a cluster and each point represents a patient, placed as the barycenter of the triangle, weights being the probabilities of belonging to each of the clusters. The closer a point is to one of the vertices, the greater is the probability of the patient to belong to the corresponding cluster.

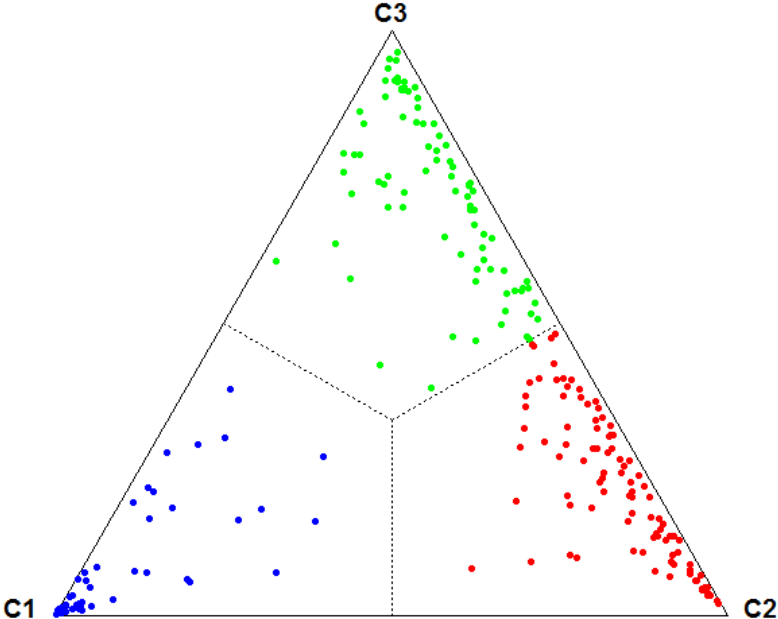

Supplement: MOESM5 [file 16732066]
