# Supplementary material for: Identification of three subtypes of triple-negative breast cancer with potential therapeutic implications
Source: Springer Nature journal article supplement (doi:10.1186/s13058-019-1148-6), 2019-05-17

**Additional file 6: Event-free survival analysis of TNBC pooled cohort.** This cohort is composed of 427 patients from internal (n = 238) and external (n = 189) cohorts (C1 & C'1 [blue]; C2 & C'2 [red] and C3 & C'3 [green]).

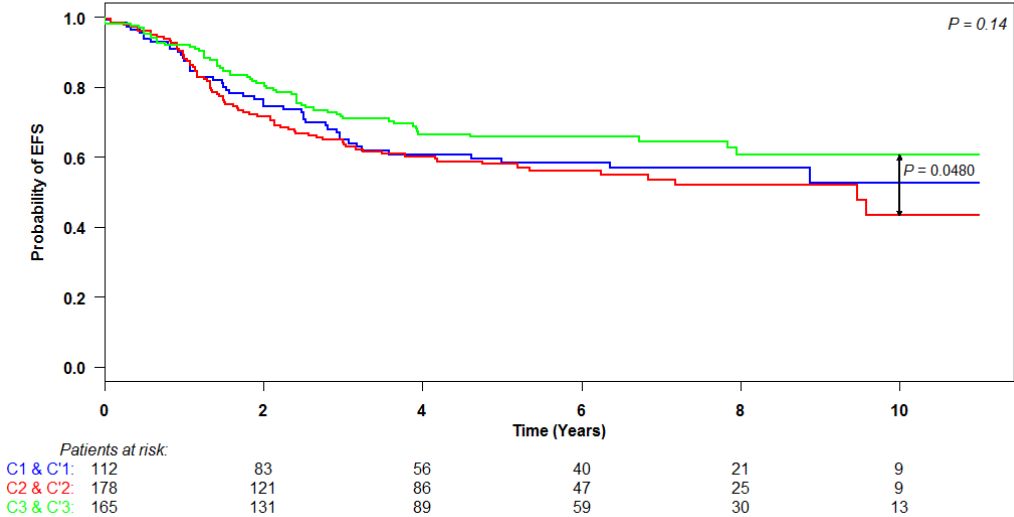

Supplement: MOESM6 [file 16732066]
