# Supplementary material for: Identification of three subtypes of triple-negative breast cancer with potential therapeutic implications
Source: Springer Nature journal article supplement (doi:10.1186/s13058-019-1148-6), 2019-05-17

**Additional file 7: Projection of internal TNBC cohort in the first PCA plane. (C1,  $n = 55$  [blue]; C2,  $n = 98$  [red]; C3,  $n = 85$  [green]).**

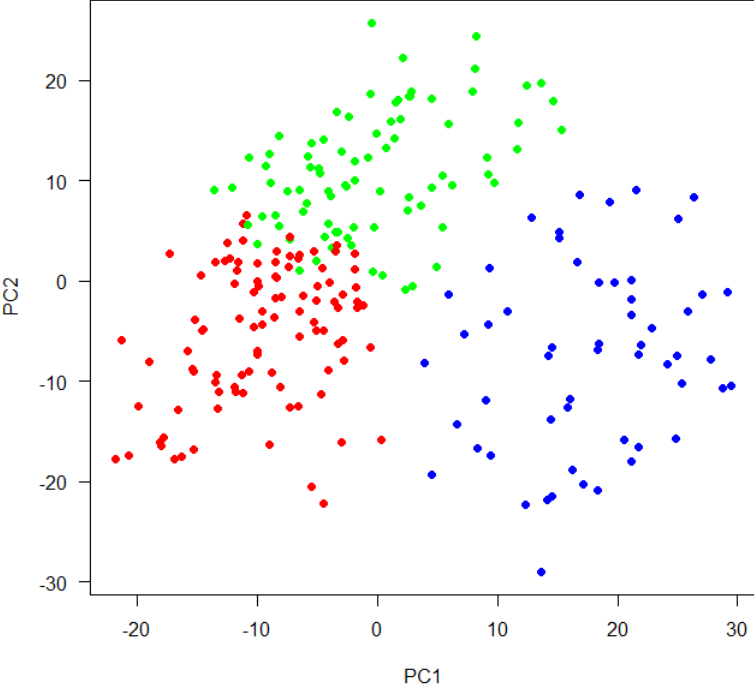

Supplement: MOESM7 [file 16732066]
