# Supplementary material for: Identification of three subtypes of triple-negative breast cancer with potential therapeutic implications
Source: Springer Nature journal article supplement (doi:10.1186/s13058-019-1148-6), 2019-05-17
Supplement: MOESM8 [file 16732066]

**Additional file 8: PCA of internal TNBC cohort. Lists of PC1 and PC2 twenty highest absolute weight probes.**

| <b>PC1</b> |                                |                                                                                                                                                                         |               |                           |                  |
|------------|--------------------------------|-------------------------------------------------------------------------------------------------------------------------------------------------------------------------|---------------|---------------------------|------------------|
| <b>N°</b>  | <b>Affymetrix probe set ID</b> | <b>Gene symbol</b>                                                                                                                                                      | <b>Weight</b> | <b>Biological pathway</b> | <b>Reference</b> |
| 1          | 206509_at                      | PIP                                                                                                                                                                     | 0.0644        | MA                        | (S40)            |
| 2          | 226192_at                      | AR                                                                                                                                                                      | 0.0635        | MA                        | (S40)            |
| 3          | 237086_at                      | FOXA1                                                                                                                                                                   | 0.0629        | MA                        | (S40)            |
| 4          | 1553394_a_at                   | TFAP2B                                                                                                                                                                  | 0.0621        | MA, PIK3CAm               | (S40, S41)       |
| 5          | 1553434_at                     | CYP4Z2P                                                                                                                                                                 | 0.0617        | PIK3CAm                   | (S41)            |
| 6          | 237339_at                      | LINC00993                                                                                                                                                               | 0.0612        | PIK3CAm                   | (S42)            |
| 7          | 237395_at                      | CYP4Z1                                                                                                                                                                  | 0.0609        | PIK3CAm                   | (S41)            |
| 8          | 223864_at                      | ANKRD30A                                                                                                                                                                | 0.0601        | PIK3CAm                   | (S41)            |
| 9          | 232105_at                      | BLACAT1                                                                                                                                                                 | -0.0600       |                           |                  |
| 10         | 214451_at                      | TFAP2B                                                                                                                                                                  | 0.0596        | MA, PIK3CAm               | (S40, S41)       |
| 11         | 204667_at                      | FOXA1                                                                                                                                                                   | 0.0595        | MA                        | (S40)            |
| 12         | 206165_s_at                    | CLCA2                                                                                                                                                                   | 0.0588        | MA                        | (S40)            |
| 13         | 228969_at                      | AGR2                                                                                                                                                                    | 0.0585        | MA                        | (S43)            |
| 14         | 204607_at                      | HMGCS2                                                                                                                                                                  | 0.0580        | MA, PIK3CAm               | (S40, S41)       |
| 15         | 222904_s_at                    | TMC5                                                                                                                                                                    | 0.0578        | PIK3CAm                   | (S41)            |
| 16         | 220192_x_at                    | SPDEF                                                                                                                                                                   | 0.0577        | MA                        | (S40)            |
| 17         | 217528_at                      | CLCA2                                                                                                                                                                   | 0.0573        | MA                        | (S40)            |
| 18         | 206164_at                      | CLCA2                                                                                                                                                                   | 0.0571        | MA                        | (S40)            |
| 19         | 1556474_a_at                   | FLJ38379                                                                                                                                                                | 0.0569        |                           |                  |
| 20         | 219580_s_at                    | TMC5                                                                                                                                                                    | 0.0566        | PIK3CAm                   | (S41)            |
| <b>PC2</b> |                                |                                                                                                                                                                         |               |                           |                  |
| <b>N°</b>  | <b>Affymetrix probe set ID</b> | <b>Gene symbol</b>                                                                                                                                                      | <b>Weight</b> | <b>Biological pathway</b> |                  |
| 1          | 205267_at                      | LOC101928620 /// POU2AF1                                                                                                                                                | 0.0802        |                           |                  |
| 2          | 217480_x_at                    | IGKV1OR1-1 /// IGKV1OR10-1 /// IGKV1OR2-1<br>/// IGKV1OR2-118                                                                                                           | 0.0797        |                           |                  |
| 3          | 217179_x_at                    | No gene                                                                                                                                                                 | 0.0797        |                           |                  |
| 4          | 211798_x_at                    | IGLJ3                                                                                                                                                                   | 0.0795        | B cell LD                 | (S44)            |
| 5          | 234764_x_at                    | CKAP2 /// DKFZp667J0810 /// IGLC1 /// IGLJ2<br>/// IGLJ2 /// IGLJ3 /// IGLJ3 /// IGLJ3 /// IGLV1-36<br>/// IGLV1-36 /// IGLV1-44 /// IGLV1-50 /// IGLV1-50<br>/// IGLV@ | 0.0795        |                           |                  |
| 6          | 217227_x_at                    | IGLV1-44                                                                                                                                                                | 0.0793        | B cell LD                 | (S44)            |
| 7          | 214916_x_at                    | IGHA1 /// IGHA2 /// IGHG1 /// IGHG3 /// IGHH4<br>/// IGHM /// IGHV3-23 /// IGHV4-31 /// IGK /// ZCWPW2                                                                  | 0.0791        |                           |                  |
| 8          | 216510_x_at                    | IGHA1 /// IGHG1 /// IGHM /// IGHV3-23 /// IGHV4-31<br>/// IGK /// ZCWPW2                                                                                                | 0.0790        |                           |                  |
| 9          | 236191_at                      | No gene                                                                                                                                                                 | 0.0790        |                           |                  |
| 10         | 217157_x_at                    | No gene                                                                                                                                                                 | 0.0784        |                           |                  |
| 11         | 211650_x_at                    | IGH /// IGHA1 /// IGHD /// IGHG1 /// IGHG3 /// IGHM<br>/// IGHV3-23 /// IGHV4-31                                                                                        | 0.0783        |                           |                  |
| 12         | 211881_x_at                    | IGLJ3                                                                                                                                                                   | 0.0783        | B cell LD                 | (S44)            |
| 13         | 214768_x_at                    | IGKV2-28 /// IGKV2D-28                                                                                                                                                  | 0.0782        |                           |                  |
| 14         | 216557_x_at                    | IGHA1 /// IGHD /// IGHG1 /// IGHG3 /// IGHM /// IGHV3-21<br>/// IGHV3-48 /// IGHV3-71 /// IGHV4-31                                                                      | 0.0781        |                           |                  |
| 15         | 215946_x_at                    | IGLL3P                                                                                                                                                                  | 0.0780        | B cell LD                 | (S44)            |
| 16         | 216207_x_at                    | IGKC                                                                                                                                                                    | 0.0780        | B cell LD                 | (S44)            |
| 17         | 211645_x_at                    | IGKV1-17                                                                                                                                                                | 0.0778        | B cell LD                 | (S44)            |
| 18         | 217148_x_at                    | IGLC1 /// IGLJ3 /// IGLV2-14 /// IGLV@                                                                                                                                  | 0.0778        |                           |                  |
| 19         | 217281_x_at                    | No gene                                                                                                                                                                 | 0.0777        |                           |                  |
| 20         | 216401_x_at                    | IGKV1-37 /// IGKV1D-37                                                                                                                                                  | 0.0775        |                           |                  |

MA: molecular apocrine; PIK3CAm: genes up-regulated in PIK3CA-mutated ERalpha-positive breast cancer cells; B cell LD: B cell lineage differentiation

## References

S40. Farmer P, Bonnefoi H, Becette V, Tubiana-Hulin M, Fumoleau P, Larsimont D et al. Identification of molecular apocrine breast tumours by microarray analysis. *Oncogene*. 2005;24:4660-71.

S41. Cizkova M, Cizeron-Clairac G, Vacher S, Susini A, Andrieu C, Lidereau R et al. Gene expression profiling reveals new aspects of PIK3CA mutation in ERalpha-positive breast cancer: major implication of the Wnt signaling pathway. *PLoS One*. 2010;5:e15647.

S42. Chen C, Li Z, Yang Y, Xiang T, Song W, Liu S. Microarray expression profiling of dysregulated long non-coding RNAs in triple-negative breast cancer. *Cancer Biol Ther*. 2015;16:856-65.

S43. Lehmann-Che J, Hamy AS, Porcher R, Barritault M, Bouhidel F, Habuellelah H et al. Molecular apocrine breast cancers are aggressive estrogen negative tumors overexpressing either HER2 or GCDFP15. *Breast Cancer Res*. 2013;15:R37.

S44. Kassambara A, Rème T, Jourdan M, Fest T, Hose D, Tarte K et al. GenomicScape : an easy-to-use web tool for gene expression data analysis. Application to investigate the molecular events in the differentiation of B cells into plasma cells. *PLoS Comput Biol*. 2015;11:e1004077.
