# Supplementary material for: Identification of three subtypes of triple-negative breast cancer with potential therapeutic implications
Source: Springer Nature journal article supplement (doi:10.1186/s13058-019-1148-6), 2019-05-17
Supplement: MOESM9 [file 16732066]

**Additional file 9: Categorical GES analyses results in function of internal TNBC clusters (C1, C2 and C3).**

| GES name    | subtype            | All<br>(n = 238) | C1<br>(n = 55) | C2<br>(n = 98) | C3<br>(n = 85) | P        |
|-------------|--------------------|------------------|----------------|----------------|----------------|----------|
| 4-TNBC      | BLIA               | 140              | 12             | 46             | 82             | < 0.0001 |
|             | BLIS               | 51               | 0              | 49             | 2              |          |
|             | LAR                | 33               | 33             | 0              | 0              |          |
|             | MES                | 14               | 10             | 3              | 1              |          |
|             | Unclassified       | 0                | 0              | 0              | 0              |          |
| CIT         | Basal-like         | 181              | 2              | 97             | 82             | < 0.0001 |
|             | Luminal A          | 0                | 0              | 0              | 0              |          |
|             | Luminal B          | 0                | 0              | 0              | 0              |          |
|             | Luminal C          | 6                | 6              | 0              | 0              |          |
|             | Molecular-apocrine | 27               | 26             | 0              | 1              |          |
| Claudin-low | Normal             | 11               | 11             | 0              | 0              | 0.204    |
|             | Unclassified       | 13               | 10             | 1              | 2              |          |
|             | Other              | 19               | 2              | 7              | 10             |          |
| ER-negative | Claudin-low        | 219              | 53             | 91             | 75             | < 0.0001 |
|             | CC+                | 22               | 0              | 22             | 0              |          |
|             | CC+/IR+            | 160              | 4              | 72             | 84             |          |
|             | ECM+               | 2                | 1              | 1              | 0              |          |
|             | IR+                | 4                | 3              | 0              | 1              |          |
| PAM50       | SR+                | 29               | 29             | 0              | 0              | < 0.0001 |
|             | Unclassified       | 21               | 18             | 3              | 0              |          |
|             | Basal-like         | 178              | 4              | 94             | 80             |          |
|             | HER2-E             | 0                | 0              | 0              | 0              |          |
|             | Luminal A          | 10               | 10             | 0              | 0              |          |
| TNBCtype    | Luminal B          | 35               | 30             | 1              | 4              | < 0.0001 |
|             | NBL                | 11               | 7              | 3              | 1              |          |
|             | Unclassified       | 4                | 4              | 0              | 0              |          |
|             | BL1                | 46               | 0              | 30             | 16             |          |
|             | BL2                | 18               | 7              | 5              | 6              |          |
|             | IM                 | 50               | 2              | 1              | 47             |          |
|             | LAR                | 20               | 20             | 0              | 0              |          |
|             | M                  | 43               | 0              | 43             | 0              |          |
| MSL         | 16                 | 12               | 1              | 3              |                |          |
|             | Unclassified       | 45               | 14             | 18             | 13             |          |

GES: gene-expression signature; BLIA: basal-like immune activated; BLIS: basal-like immune suppressed ; LAR: luminal androgen receptor; MES: mesenchymal; CIT: tumor identity card; CC+: cell cycle; CC+/IR+: cell cycle and immune response; ECM+: extracellular matrix; IR+: immune response; SR+: steroid hormone response; NBL: normal breast-like; BL1: basal-like 1; BL2: basal-like 2; IM: immunomodulatory; M: mesenchymal-like; MSL: mesenchymal stem-like.
