# Supplementary material for: Identification of three subtypes of triple-negative breast cancer with potential therapeutic implications
Source: Springer Nature journal article supplement (doi:10.1186/s13058-019-1148-6), 2019-05-17
Supplement: MOESM10 [file 16732066]

**Additional file 10: Continuous score GES analyses results in function of internal TNBC clusters (C1, C2 and C3).**

| GES name                                      | P        | P        |          |          | Results                      |
|-----------------------------------------------|----------|----------|----------|----------|------------------------------|
|                                               |          | C1 vs C2 | C1 vs C3 | C2 vs C3 |                              |
| <b>Molecular subtyping</b>                    |          |          |          |          |                              |
| AR                                            | < 0.0001 | < 0.0001 | < 0.0001 | 0.1155   | C1 > C2 ≈ C3                 |
| Basal-like                                    | < 0.0001 | < 0.0001 | < 0.0001 | < 0.0001 | C1 < C3 < C2                 |
| Claudin-CD24                                  | 0.4216   |          |          |          | NS                           |
| ER                                            | < 0.0001 | < 0.0001 | < 0.0001 | 0.4577   | C1 > C2 ≈ C3                 |
| ERBB2                                         | 0.0010   | 0.0168   | 0.0007   | 0.4582   | C1 > C2 ≈ C3                 |
| Molecular-apocrine                            | < 0.0001 | < 0.0001 | < 0.0001 | 0.5118   | C1 > C2 ≈ C3                 |
| <b>Immune response</b>                        |          |          |          |          |                              |
| B-cell                                        | < 0.0001 | 0.0061   | < 0.0001 | < 0.0001 | C2 < C1 < C3                 |
| CYT                                           | < 0.0001 | 0.0010   | < 0.0001 | < 0.0001 | C2 < C1 < C3                 |
| IL-8                                          | 0.5269   |          |          |          | NS                           |
| M2/M1                                         | < 0.0001 | 0.7797   | < 0.0001 | < 0.0001 | C1 ≈ C2 > C3                 |
| M2/M1 (Becker)                                | < 0.0001 | 0.5333   | < 0.0001 | < 0.0001 | C1 ≈ C2 > C3                 |
| MHC-1                                         | < 0.0001 | 0.9562   | < 0.0001 | < 0.0001 | C1 ≈ C2 < C3                 |
| MHC-2                                         | < 0.0001 | < 0.0001 | 0.0001   | < 0.0001 | C2 < C1 < C3                 |
| STAT1                                         | < 0.0001 | 0.9341   | < 0.0001 | < 0.0001 | C3 > C1 ≈ C2                 |
| T-cell                                        | < 0.0001 | < 0.0001 | < 0.0001 | < 0.0001 | C2 < C1 < C3                 |
| Type I IFN                                    | < 0.0001 | 0.9658   | < 0.0001 | < 0.0001 | C1 ≈ C2 < C3                 |
| <b>Microenvironment cells</b>                 |          |          |          |          |                              |
| Epithelial cells                              | 0.0731   |          |          |          | NS                           |
| Fibroblasts                                   | 0.0008   | 0.9814   | 0.0061   | 0.0022   | C1 ≈ C2 > C3                 |
| Neurons                                       | 0.0208   | 0.9967   | 0.0664   | 0.0323   | C2 > C3, C1 ≈ C2 and C1 ≈ C3 |
| <b>Metabolism</b>                             |          |          |          |          |                              |
| Adipocytes                                    | < 0.0001 | < 0.0001 | < 0.0001 | 0.5065   | C1 > C2 ≈ C3                 |
| Glycolysis                                    | < 0.0001 | < 0.0001 | 0.0039   | 0.1663   | C1 < C2 ≈ C3                 |
| IRGS                                          | < 0.0001 | < 0.0001 | < 0.0001 | 0.0022   | C1 < C3 < C2                 |
| <b>Critical biological pathways in cancer</b> |          |          |          |          |                              |
| AKT                                           | < 0.0001 | 0.0003   | < 0.0001 | 0.6547   | C1 < C2 ≈ C3                 |
| β-Catenin                                     | 0.6039   |          |          |          | NS                           |
| CIN                                           | < 0.0001 | < 0.0001 | < 0.0001 | 0.2853   | C1 < C2 ≈ C3                 |
| E2F3                                          | < 0.0001 | < 0.0001 | 0.1687   | 0.0006   | C1 ≈ C3 < C2                 |
| EGFR                                          | < 0.0001 | < 0.0001 | < 0.0001 | 0.2540   | C1 < C2 ≈ C3                 |
| HOXA                                          | < 0.0001 | < 0.0001 | < 0.0001 | 0.6825   | C1 > C2 ≈ C3                 |
| MITO/OXPHOS                                   | 0.8867   |          |          |          | NS                           |
| MYC                                           | < 0.0001 | < 0.0001 | < 0.0001 | 0.1406   | C1 < C2 ≈ C3                 |
| p53                                           | < 0.0001 | < 0.0001 | < 0.0001 | 0.2218   | C1 > C2 ≈ C3                 |
| PIK3CA                                        | < 0.0001 | < 0.0001 | < 0.0001 | < 0.0001 | C1 > C3 > C2                 |
| PNI                                           | < 0.0001 | < 0.0001 | 0.0013   | 0.0004   | C1 < C3 < C2                 |
| PRL                                           | < 0.0001 | < 0.0001 | < 0.0001 | 0.6417   | C1 > C2 ≈ C3                 |
| Proliferation                                 | < 0.0001 | < 0.0001 | < 0.0001 | 0.6327   | C1 < C2 ≈ C3                 |
| PTEN loss                                     | < 0.0001 | < 0.0001 | < 0.0001 | 0.9444   | C1 < C2 ≈ C3                 |
| RAS                                           | 0.1017   |          |          |          | NS                           |
| Reactive stroma                               | < 0.0001 | < 0.0001 | < 0.0001 | 0.9429   | C1 > C2 ≈ C3                 |
| SRC                                           | 0.2019   |          |          |          | NS                           |
| Stroma-CD10                                   | 0.0001   | 0.6269   | 0.0004   | 0.0017   | C1 ≈ C2 > C3                 |
| TGFβ                                          | 0.0113   | 0.0300   | 0.9409   | 0.0332   | C1 ≈ C3 < C2                 |
| VEGF                                          | < 0.0001 | < 0.0001 | 0.6654   | < 0.0001 | C1 ≈ C3 < C2                 |
| Wound-response                                | < 0.0001 | < 0.0001 | < 0.0001 | 0.1877   | C1 < C2 ≈ C3                 |
| YAP1-WWTR1                                    | 0.0069   | 0.0258   | 0.9782   | 0.0183   | C1 ≈ C3 < C2                 |
| <b>Prognosis</b>                              |          |          |          |          |                              |
| 38-GES                                        | < 0.0001 | < 0.0001 | < 0.0001 | < 0.0001 | C1 < C3 < C2                 |
| 70-GES                                        | < 0.0001 | < 0.0001 | < 0.0001 | 0.0122   | C1 < C3 < C2                 |
| GGI                                           | < 0.0001 | < 0.0001 | < 0.0001 | 0.9126   | C1 < C2 ≈ C3                 |

GES: gene-expression signature; NS: not significant ( $P > 0.05$ ).
