# Supplementary material for: Identification of three subtypes of triple-negative breast cancer with potential therapeutic implications
Source: Springer Nature journal article supplement (doi:10.1186/s13058-019-1148-6), 2019-05-17

**Additional file 11: Significant EFS analyses based on GES scores. (A) Internal and (B) external C2 and C3 TNBC patients.**

**A**

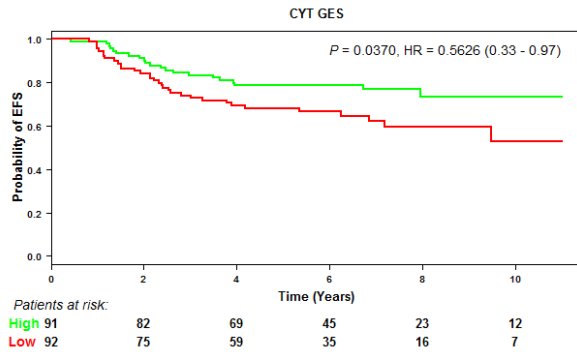

**B**

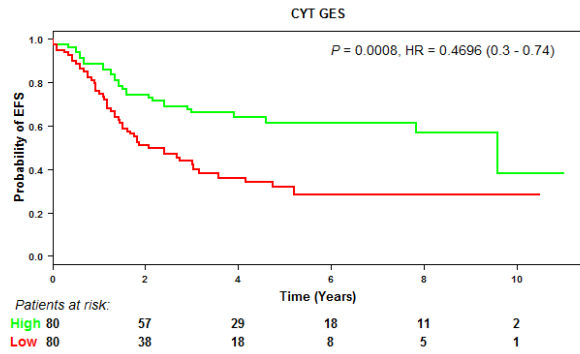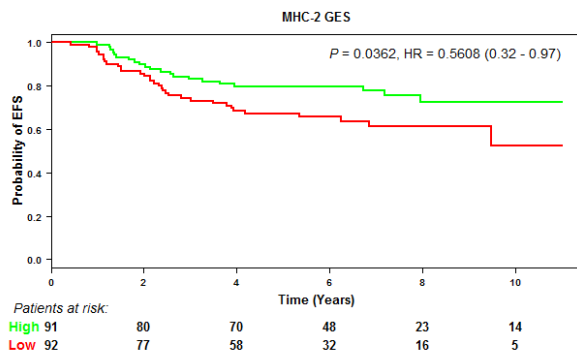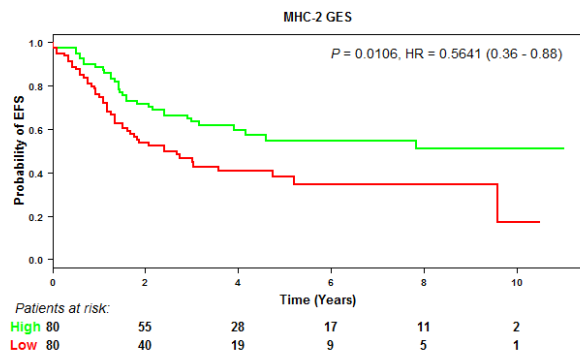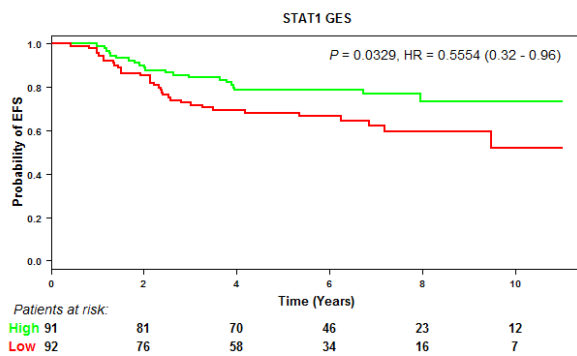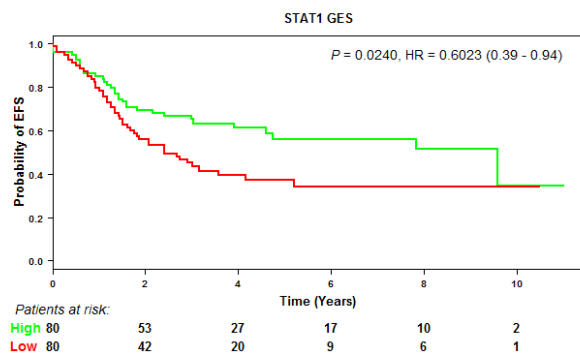

Supplement: MOESM11 [file 16732066]
