# Supplementary material for: Identification of three subtypes of triple-negative breast cancer with potential therapeutic implications
Source: Springer Nature journal article supplement (doi:10.1186/s13058-019-1148-6), 2019-05-17
Supplement: MOESM12 [file 16732066]

**Additional file 12: ToppGene GOEA based on heatmap gene clusters, internal cohort (1843 probes) and external cohort (454 probes).** Identical GO terms per cluster of highly expressed genes are indicated in bold characters.

| Cluster | Internal cohort                                                                                                                                                                                                                                                                                                                                                     | Cluster | External cohort                                                                                                                                                                                                                                                                                                                                                                                                                                                           |
|---------|---------------------------------------------------------------------------------------------------------------------------------------------------------------------------------------------------------------------------------------------------------------------------------------------------------------------------------------------------------------------|---------|---------------------------------------------------------------------------------------------------------------------------------------------------------------------------------------------------------------------------------------------------------------------------------------------------------------------------------------------------------------------------------------------------------------------------------------------------------------------------|
| H1      | Chemical homeostasis<br><b>Regulation of hormone levels</b><br><b>Hormone metabolic process</b><br><b>Response to lipid</b><br>Oxidation-reduction process<br>Lipid metabolic process<br>Response to steroid hormone<br>Digestion<br>Homeostatic process<br><b>Response to hormone</b>                                                                              | H'1     | <b>Response to lipid</b><br>Growth<br><b>Hormone metabolic process</b><br>Leukocyte migration<br>Regulation of response to wounding<br>Regulation of response to external stimulus<br>Chemokine production<br>Regulation of inflammatory response<br>Negative regulation of cell proliferation<br><b>Regulation of hormone levels</b>                                                                                                                                     |
| H2a     | Central nervous system development<br>Animal organ morphogenesis<br>Neurogenesis<br><b>Sensory organ development</b><br>Ear development<br>Inner ear development<br>Generation of neurons<br><b>Sensory organ morphogenesis</b><br>Neuron differentiation<br>Neuron development                                                                                     | H'2b    | Embryonic eye morphogenesis<br><b>Sensory organ morphogenesis</b><br>Eye morphogenesis<br>Forebrain neuron differentiation<br><b>Sensory organ development</b><br>Forebrain generation of neurons<br>Odontogenesis of dentin-containing tooth                                                                                                                                                                                                                             |
| H2b     | Antibacterial peptide production<br>Antimicrobial peptide production<br>Neural crest cell migration<br>Extracellular matrix organization<br><b>Epithelium development</b><br>Extracellular structure organization<br><b>Collagen catabolic process</b><br>Epidermis development<br><b>Multicellular organism catabolic process</b><br>Ameboidal-type cell migration | H'2a    | <b>Collagen catabolic process</b><br>Stem cell differentiation<br><b>Multicellular organismal catabolic process</b><br><b>Epithelium development</b><br>Intermediate filament cytoskeleton organization<br>Mesenchyme development<br>Intermediate filament-based process<br>Cell motility<br>Localization of cell<br>Central nervous system development                                                                                                                   |
| H3      | <b>Regulation of immune system process</b><br><b>Immune response</b><br><b>Positive regulation of immune system process</b><br><b>B cell receptor signaling pathway</b><br>Defense response<br>Immune effector process<br><b>Adaptive immune response</b><br>Cell activation<br>Regulation of leucocyte activation<br>B cell activation                             | H'3     | <b>Regulation of immune system process</b><br><b>Immune response</b><br><b>Positive regulation of immune system process</b><br>Antigen receptor-mediated signaling pathway<br><b>B cell receptor signaling pathway</b><br>Immune response-activating cell surface receptor signaling pathway<br>Immune response-regulating cell surface receptor signaling pathway<br>Regulation of immune response<br><b>Adaptive immune response</b><br>Regulation of B cell activation |
