# Supplementary material for: Identification of three subtypes of triple-negative breast cancer with potential therapeutic implications
Source: Springer Nature journal article supplement (doi:10.1186/s13058-019-1148-6), 2019-05-17
Supplement: MOESM13 [file 16732066]

**Additional file 13: ToppGene GOEA based on SAM gene lists for the three clusters, internal and external cohorts.** Identical GO terms per SAM lists are indicated in bold characters.

|                      | <b>Internal cohort</b>                                                                                                                                                                                                                                                                                                                                                                            | <b>External cohort</b>                                                                                                                                                                                                                                                                                                                                                    |
|----------------------|---------------------------------------------------------------------------------------------------------------------------------------------------------------------------------------------------------------------------------------------------------------------------------------------------------------------------------------------------------------------------------------------------|---------------------------------------------------------------------------------------------------------------------------------------------------------------------------------------------------------------------------------------------------------------------------------------------------------------------------------------------------------------------------|
| C1 high vs C2 low    | <b>Lipid metabolic process</b><br><b>Single-organism catabolic process</b><br>Oxidation-reduction process<br><b>Vasculature development</b><br><b>Blood vessel development</b><br><b>Cardiovascular system development</b><br><b>Circulatory system development</b><br><b>Cellular lipid metabolic process</b><br>Secretion<br>Organonitrogen compound catabolic process                          | <b>Lipid metabolic process</b><br>Cell migration<br><b>Circulatory system development</b><br><b>Cardiovascular system development</b><br><b>Cellular lipid metabolic process</b><br><b>Single-organism catabolic process</b><br><b>Vasculature development</b><br>Regulation of cell migration<br><b>Blood vessel development</b><br>Localization of cell                 |
| C1 low vs C2 high    | <b>Cell cycle</b><br><b>Cell cycle process</b><br><b>Mitotic cell cycle</b><br><b>Mitotic cell cycle process</b><br><b>Chromosome organization</b><br><b>Mitotic nuclear division</b><br><b>Nuclear division</b><br><b>Organelle fission</b><br>Chromosome segregation<br><b>Sister chromatid segregation</b>                                                                                     | <b>Mitotic cell cycle</b><br><b>Mitotic cell cycle process</b><br><b>Cell cycle</b><br><b>Cell cycle process</b><br><b>Mitotic nuclear division</b><br><b>Nuclear division</b><br><b>Organelle fission</b><br><b>Sister chromatid segregation</b><br>Cell division<br><b>Chromosome organization</b>                                                                      |
| C1 high vs C3 low    | Cardiovascular system development<br>Circulatory system development<br><b>Cell projection organization</b><br>Movement of cell or subcellular component<br>Anatomical structure formation involved in morphogenesis<br>Cellular component morphogenesis<br>Skeletal system development<br>Cell morphogenesis<br>Urogenital system development<br>Regulation of anatomical structure morphogenesis | <b>Cellular lipid metabolic process</b><br>Lipid modification<br><b>Cell projection organization</b><br>Neuron projection development<br>Fatty acid metabolic process<br>Establishment of vesicle localization<br>Lipid biosynthetic process<br>Vesicle localization<br>Neuron development                                                                                |
| C1 low vs C3 high    | <b>Immune response</b><br>Mitotic cell cycle<br>Mitotic cell cycle process<br>Cell cycle process<br>Cell cycle<br><b>Regulation of immune system process</b><br>Positive regulation of immune system process<br><b>Lymphocyte activation</b><br><b>Leukocyte activation</b><br><b>Regulation of immune response</b>                                                                               | <b>Immune response</b><br><b>Lymphocyte activation</b><br><b>Regulation of immune system process</b><br><b>Leukocyte activation</b><br>Positive regulation of immune response<br><b>Regulation of immune response</b><br>Leukocyte cell-cell adhesion<br>Cell activation<br>Leukocyte aggregation<br>Positive regulation of immune response<br>No results displayed       |
| C2 high vs C3 low    | Bone development<br>Dorsal/ventral pattern formation<br>Neural tube development<br>Smoothened signaling pathway<br>Cell projection organization<br>Cellular component morphogenesis<br>Cell morphogenesis<br>Neural tube closure<br>Digestive system process<br>Tube closure                                                                                                                      |                                                                                                                                                                                                                                                                                                                                                                           |
| C2 low vs C3 high    | <b>Immune response</b><br><b>Regulation of immune system process</b><br><b>Regulation of immune response</b><br><b>Defense response</b><br><b>Positive regulation of immune system process</b><br><b>Leukocyte activation</b><br><b>Cell activation</b><br><b>Innate immune response</b><br><b>Lymphocyte activation</b><br><b>Positive regulation of immune response</b>                         | <b>Immune response</b><br><b>Regulation of immune system process</b><br><b>Regulation of immune response</b><br><b>Positive regulation of immune system process</b><br><b>Defense response</b><br><b>Leukocyte activation</b><br><b>Cell activation</b><br><b>Positive regulation of immune response</b><br><b>Innate immune response</b><br><b>Lymphocyte activation</b> |
| C1 high vs C2-C3 low | Cardiovascular system development<br>Circulatory system development<br>Oxidation-reduction process<br><b>Lipid metabolic process</b><br>Vasculature development<br>Blood vessel development<br>Response to endogenous stimulus<br>Enzyme linked receptor protein signaling pathway<br><b>Cellular lipid metabolic process</b><br>Organic acid catabolic process                                   | <b>Lipid metabolic process</b><br><b>Cellular lipid metabolic process</b><br>Single-organism catabolic process<br>Cell migration<br>Neuron development<br>Regulation of anatomical structure morphogenesis<br>Neuron projection development<br>Localization of cell<br>Cell motility<br>Nucleoside diphosphate catabolic process                                          |
| C1 low vs C2-C3 high | <b>Mitotic cell cycle</b><br><b>Cell cycle</b><br><b>Mitotic cell cycle process</b><br><b>Cell cycle process</b><br>Chromosome organization<br><b>Mitotic nuclear division</b><br><b>Nuclear division</b><br><b>Organelle fission</b><br><b>Sister chromatid segregation</b><br>Chromosome segregation                                                                                            | <b>Mitotic cell cycle</b><br><b>Mitotic cell cycle process</b><br><b>Cell cycle</b><br><b>Cell cycle process</b><br><b>Mitotic nuclear division</b><br><b>Nuclear division</b><br><b>Organelle fission</b><br>Cell cycle phase transition<br>Mitotic cell cycle phase transition<br><b>Sister chromatid segregation</b>                                                   |
