# Supplementary material for: Identification of three subtypes of triple-negative breast cancer with potential therapeutic implications
Source: Springer Nature journal article supplement (doi:10.1186/s13058-019-1148-6), 2019-05-17
Supplement: MOESM14 [file 16732066]

**Additional file 14: B lymphocyte lineage GenomicScope analysis in function of the three H3 subclusters (H3a, H3b, H3c).** Genes upregulated in the given group compared to the overall mean expression are highlighted in red. Genes downregulated in the given group compared to the overall mean expression are highlighted in blue.

| Cluster | Affymetrix probe set ID | Gene Symbol na35    | Score | NBCs  | CBs   | CCs   | MBCs   | prePBs | PBs   | EPCs  | BMPCs  |
|---------|-------------------------|---------------------|-------|-------|-------|-------|--------|--------|-------|-------|--------|
| H3a     | 227915_at               | <i>ASB2</i>         | 0.13  | -1.80 | 3.27  | 4.85  | -1.97  | 2.35   | -1.37 | -2.86 | -0.85  |
|         | 220423_at               | <i>PLA2G2D</i>      | 0.20  | -3.41 | -3.41 | -3.41 | -3.41  | -3.41  | -3.31 | -3.41 | 22.40  |
|         | 210321_at               | <i>GZMH</i>         | 0.14  | -1.43 | -1.43 | -1.43 | -1.22  | -1.43  | 7.90  | -1.37 | -0.165 |
|         | 1555120_at              | <i>CD96</i>         | 0.11  | -1.05 | -1.05 | -1.05 | -1.05  | 6.95   | -1.05 | -1.05 | -1.05  |
|         | 210164_at               | <i>GZMB</i>         | 0.13  | -1.68 | -1.74 | -1.70 | -0.85  | 0.12   | 5.16  | 1.63  | -1.63  |
|         | 238581_at               | <i>GBP5</i>         | 0.15  | 2.08  | -4.33 | -3.46 | 0.91   | 0.52   | 2.53  | 3.13  | -2.925 |
|         | 219836_at               | <i>ZBED2</i>        | 0.19  | -2.56 | -0.53 | 6.52  | -2.56  | 8.035  | -2.56 | -2.56 | -2.56  |
| H3b     | 210313_at               | <i>LILRA4</i>       | 0.06  | -0.05 | -0.91 | -0.34 | 1.60   | -1.44  | -0.49 | -0.23 | 1.61   |
|         | 1558186_s_at            | ---                 | 0.16  | -2.79 | 5.70  | 5.395 | -2.81  | -2.78  | -0.34 | 2.61  | -2.76  |
|         | 235885_at               | <i>P2RY12</i>       | 0.21  | -2.04 | 6.80  | 8.74  | -2.21  | -2.295 | -2.29 | -2.28 | -1.31  |
|         | 1553380_at              | <i>PARP15</i>       | 0.22  | 7.42  | -4.64 | -4.35 | 6.915  | 4.10   | -2.37 | -4.37 | -4.495 |
|         | 235982_at               | <i>FCRL1</i>        | 0.225 | 6.79  | 3.35  | 3.79  | 4.02   | -2.95  | -4.88 | -4.88 | -3.825 |
|         | 228592_at               | <i>MS4A1</i>        | 0.26  | 4.49  | 4.39  | 5.00  | 4.37   | -0.56  | -7.54 | -7.43 | -0.83  |
|         | 206255_at               | <i>BLK</i>          | 0.15  | 3.21  | 2.47  | 1.72  | 3.17   | -1.21  | -0.64 | -3.08 | -4.815 |
|         | 235401_s_at             | <i>FCRLA</i>        | 0.09  | -0.11 | 2.59  | 3.02  | -0.45  | 0.09   | -1.26 | -1.90 | -0.85  |
|         | 206398_s_at             | <i>CD19</i>         | 0.11  | 1.45  | 2.99  | 3.58  | 0.69   | -0.31  | -1.55 | -2.98 | -2.56  |
|         | 205544_s_at             | <i>CR2</i>          | 0.16  | 1.13  | 4.95  | 5.85  | -0.49  | -3.24  | -2.72 | -0.30 | -3.015 |
|         | 224499_s_at             | <i>AICDA</i>        | 0.34  | -5.79 | 15.62 | 10.62 | -5.79  | 7.70   | -5.79 | -5.79 | -5.55  |
|         | 230896_at               | <i>BEND4</i>        | 0.145 | 2.19  | 2.25  | 2.08  | 2.30   | 1.89   | -1.33 | -4.52 | -3.98  |
| H3c     | 217260_x_at             | <i>LOC102723479</i> | 0.05  | -0.78 | -0.79 | -0.65 | -0.80  | 0.22   | 0.06  | 1.32  | 1.13   |
|         | 230673_at               | <i>PKHD1L1</i>      | 0.06  | -1.78 | 1.30  | 1.23  | -1.42  | -0.62  | 1.01  | 0.77  | 0.02   |
|         | 242020_s_at             | <i>ZBP1</i>         | 0.14  | 0.83  | -3.83 | -3.71 | 1.47   | -3.07  | 1.32  | 2.78  | 2.71   |
|         | 216829_at               | ---                 | 0.17  | -2.82 | -2.85 | 0.39  | -3.985 | -2.37  | 2.19  | 4.34  | 4.60   |
|         | 217235_x_at             | <i>IGLL5</i>        | 0.12  | -3.16 | -1.37 | 0.32  | -2.74  | -0.37  | 2.09  | 2.46  | 2.54   |
|         | 211637_x_at             | ---                 | 0.14  | -1.14 | -2.29 | 0.69  | -4.41  | -1.23  | 2.28  | 2.65  | 3.13   |
|         | 211639_x_at             | ---                 | 0.135 | -0.67 | -3.16 | 0.65  | -4.30  | -1.40  | 2.71  | 3.17  | 2.50   |
|         | 219159_s_at             | <i>SLAMF7</i>       | 0.23  | -5.90 | -4.29 | 0.27  | -5.13  | 0.09   | 3.59  | 4.72  | 5.85   |
|         | 211650_x_at             | ---                 | 0.13  | -1.94 | -2.72 | 0.42  | -3.87  | -0.39  | 2.27  | 2.98  | 2.78   |
|         | 211908_x_at             | <i>IGK</i>          | 0.145 | -2.28 | -3.28 | 0.455 | -3.93  | -0.46  | 2.51  | 3.12  | 3.30   |
|         | 217281_x_at             | ---                 | 0.12  | -1.82 | -2.15 | 0.79  | -3.73  | -0.46  | 2.20  | 2.02  | 2.88   |
|         | 217022_s_at             | ---                 | 0.12  | -5.16 | -2.68 | -0.39 | 0.08   | 1.495  | 2.10  | 2.15  | 1.795  |
|         | 212592_at               | <i>IGJ</i>          | 0.08  | -2.90 | -0.81 | 0.54  | -2.30  | 0.62   | 2.13  | 2.29  | 0.36   |
|         | 224405_at               | <i>FCRL5</i>        | 0.12  | -1.06 | -1.92 | 0.66  | -2.66  | -2.31  | 2.29  | 2.045 | 2.72   |
|         | 207237_at               | <i>KCNA3</i>        | 0.10  | 1.86  | -2.99 | -3.37 | -0.13  | -0.22  | 1.27  | 1.695 | 0.61   |
|         | 206641_at               | <i>TNFRSF17</i>     | 0.22  | -7.31 | 0.635 | 1.46  | -5.69  | 1.73   | 3.27  | 3.23  | 3.09   |
|         | 223565_at               | <i>MZB1</i>         | 0.14  | -2.59 | -1.17 | 0.89  | -4.52  | -0.56  | 2.18  | 2.22  | 3.50   |

NBCs: naive B cells; CBs: centroblasts; CCs: centrocytes; MBCs: memory B cells; prePBs: preplasmablasts; PBs: plasmablasts; EPCs: early plasma cells; BMPCs: bone marrow plasma cells.
