# Supplementary material for: Identification of three subtypes of triple-negative breast cancer with potential therapeutic implications
Source: Springer Nature journal article supplement (doi:10.1186/s13058-019-1148-6), 2019-05-17

**Additional file 15: Biological gradients between C2 and C3 in our internal cohort.**

Correlation coefficient calculation between GES score for each internal cohort tumor (x number), and C2 and C3 cluster probability orthogonal projection on C2-C3 axis (y number) (C2 tumor, red; C3 tumor, green). Only correlation coefficient absolute values superior to 0.5 ( $P < 0.0001$ ) are displayed.

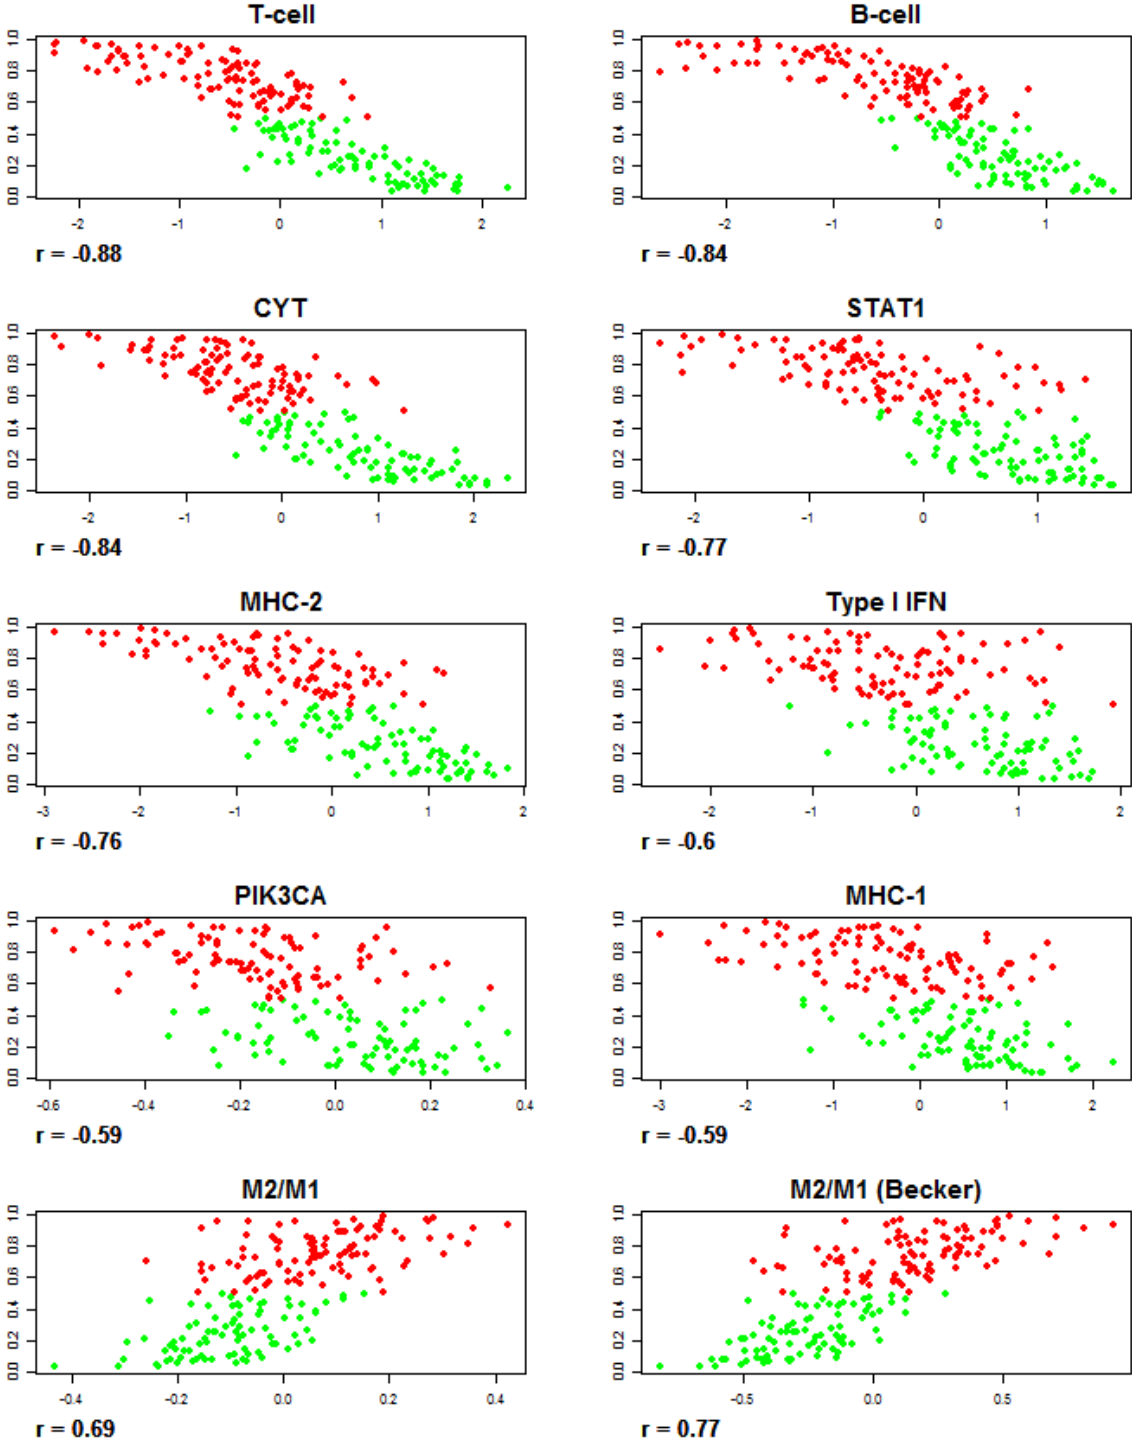

Supplement: MOESM15 [file 16732066]
