# Supplementary material for: Identification of three subtypes of triple-negative breast cancer with potential therapeutic implications
Source: Springer Nature journal article supplement (doi:10.1186/s13058-019-1148-6), 2019-05-17
Supplement: MOESM16 [file 16732066]

**Additional file 16: Expression of immune checkpoints between basal-like clusters.**

Internal (C2 vs C3) and external (C'2 vs C'3) cohorts.

| Gene symbol          | P C2 vs C3 | C2 vs C3 | P C'2 vs C'3 | C'2 vs C'3 |
|----------------------|------------|----------|--------------|------------|
| <i>ADORA2A</i>       | < 0.0001   | 2 < 3    | < 0.0001     | 2 < 3      |
| <i>BTLA</i>          | < 0.0001   | 2 < 3    | < 0.0001     | 2 < 3      |
| <i>BTNL2</i>         | 0.4081     | 2 = 3    | 0.9107       | 2 = 3      |
| <i>C10orf54</i>      | < 0.0001   | 2 < 3    | < 0.0001     | 2 < 3      |
| <i>CD27</i>          | < 0.0001   | 2 < 3    | < 0.0001     | 2 < 3      |
| <i>CD28</i>          | < 0.0001   | 2 < 3    | < 0.0001     | 2 < 3      |
| <i>CD40</i>          | < 0.0001   | 2 < 3    | < 0.0001     | 2 < 3      |
| <i>CD40LG</i>        | < 0.0001   | 2 < 3    | < 0.0001     | 2 < 3      |
| <i>CD44</i>          | 0.0356     | 2 < 3    | 0.913        | 2 < 3      |
| <i>CD48</i>          | < 0.0001   | 2 < 3    | < 0.0001     | 2 < 3      |
| <i>CD70</i>          | 0.0082     | 2 < 3    | 0.0004       | 2 < 3      |
| <i>CD80</i>          | < 0.0001   | 2 < 3    | < 0.0001     | 2 < 3      |
| <i>CD86</i>          | < 0.0001   | 2 < 3    | < 0.0001     | 2 < 3      |
| <i>CD160</i>         | < 0.0001   | 2 < 3    | 0.0081       | 2 < 3      |
| <i>CD200</i>         | 0.0005     | 2 < 3    | 0.0026       | 2 < 3      |
| <i>CD200R1</i>       | < 0.0001   | 2 < 3    | < 0.0001     | 2 < 3      |
| <i>CD244</i>         | < 0.0001   | 2 < 3    | 0.0946       | 2 = 3      |
| <i>CD274 (PD-L1)</i> | < 0.0001   | 2 < 3    | < 0.0001     | 2 < 3      |
| <i>CD276</i>         | 0.2043     | 2 = 3    | 0.7991       | 2 = 3      |
| <i>CTLA4</i>         | < 0.0001   | 2 < 3    | < 0.0001     | 2 < 3      |
| <i>HAVCR2</i>        | < 0.0001   | 2 < 3    | < 0.0001     | 2 < 3      |
| <i>HLA2</i>          | 0.4083     | 2 = 3    | 0.6122       | 2 = 3      |
| <i>ICOS</i>          | < 0.0001   | 2 < 3    | < 0.0001     | 2 < 3      |
| <i>ICOSLG</i>        | 0.5792     | 2 = 3    | 0.2997       | 2 = 3      |
| <i>IDO1</i>          | < 0.0001   | 2 < 3    | < 0.0001     | 2 < 3      |
| <i>IDO2</i>          | < 0.0001   | 2 < 3    | 0.0001       | 2 < 3      |
| <i>KIR3DL1</i>       | 0.0067     | 2 < 3    | 0.1582       | 2 = 3      |
| <i>LAG3</i>          | < 0.0001   | 2 < 3    | < 0.0001     | 2 < 3      |
| <i>LAIR1</i>         | < 0.0001   | 2 < 3    | < 0.0001     | 2 < 3      |
| <i>LGALS9</i>        | < 0.0001   | 2 < 3    | < 0.0001     | 2 < 3      |
| <i>NRP1</i>          | 0.785      | 2 = 3    | 0.0076       | 2 < 3      |
| <i>PDCD1 (PD1)</i>   | 0.0002     | 2 < 3    | 0.0002       | 2 < 3      |
| <i>PDCD1LG2</i>      | < 0.0001   | 2 < 3    | < 0.0001     | 2 < 3      |
| <i>TIGIT</i>         | < 0.0001   | 2 < 3    | < 0.0001     | 2 < 3      |
| <i>TMIGD2</i>        | 0.1157     | 2 = 3    | 0.0063       | 2 < 3      |
| <i>TNFRSF4</i>       | < 0.0001   | 2 < 3    | 0.0001       | 2 < 3      |
| <i>TNFRSF8</i>       | 0.0109     | 2 < 3    | < 0.0001     | 2 < 3      |
| <i>TNFRSF9</i>       | < 0.0001   | 2 < 3    | < 0.0001     | 2 < 3      |
| <i>TNFRSF14</i>      | < 0.0001   | 2 < 3    | < 0.0001     | 2 < 3      |
| <i>TNFRSF18</i>      | < 0.0001   | 2 < 3    | < 0.0001     | 2 < 3      |
| <i>TNFRSF25</i>      | < 0.0001   | 2 < 3    | 0.0056       | 2 < 3      |
| <i>TNFSF4</i>        | 0.0001     | 2 < 3    | < 0.0001     | 2 < 3      |
| <i>TNFSF9</i>        | 0.0003     | 2 < 3    | 0.9956       | 2 = 3      |
| <i>TNFSF14</i>       | < 0.0001   | 2 < 3    | < 0.0001     | 2 < 3      |
| <i>TNFSF15</i>       | 0.7979     | 2 = 3    | 0.0005       | 2 < 3      |
| <i>TNFSF18</i>       | 0.1632     | 2 = 3    | 0.8899       | 2 = 3      |
| <i>VTCN1 (B7-H4)</i> | 0.0092     | 2 > 3    | < 0.0001     | 2 > 3      |
