# Supplementary material for: Identification of three subtypes of triple-negative breast cancer with potential therapeutic implications
Source: Springer Nature journal article supplement (doi:10.1186/s13058-019-1148-6), 2019-05-17
Supplement: MOESM17 [file 16732066]

**Additional file 17: Comparison of internal and external TNBC cohorts' clinicopathologic characteristics.**

| <b>Characteristic</b>  | <b>Internal cohort<br/>(n = 238)</b> | <b>External cohort<br/>(n = 257)</b> | <b>P</b>   |      |
|------------------------|--------------------------------------|--------------------------------------|------------|------|
| Clusters               |                                      |                                      |            |      |
|                        | 1                                    | 55                                   | 61         | 0.73 |
|                        | 2                                    | 98                                   | 97         |      |
|                        | 3                                    | 85                                   | 99         |      |
| Age (years; mean ± sd) |                                      | 54.6± 11.6                           | 53.5± 12.3 | 0.34 |
| SBR grade              |                                      |                                      |            |      |
|                        | 1 or 2                               | 43                                   | 46         | 1.00 |
|                        | 3                                    | 195                                  | 205        |      |

sd: standard deviation
