# Supplementary material for: Identification of three subtypes of triple-negative breast cancer with potential therapeutic implications
Source: Springer Nature journal article supplement (doi:10.1186/s13058-019-1148-6), 2019-05-17
Supplement: MOESM18 [file 16732066]

**Additional file 18: External TNBC cohort's clinicopathologic characteristics in function of the three clusters (C'1, C'2 and C'3).**

| <b>Characteristic</b> | <b>All<br/>(n = 257)</b> | <b>C'1<br/>(n = 61)</b> | <b>C'2<br/>(n = 97)</b> | <b>C'3<br/>(n = 99)</b> | <b>P</b> |
|-----------------------|--------------------------|-------------------------|-------------------------|-------------------------|----------|
| Age (years; mean± sd) | 53.5± 12.3               | 59.1±11.7               | 52.0±12.5               | 51.6±11.4               | 0.0002   |
| SBR grade             |                          |                         |                         |                         |          |
| 1 or 2                | 46                       | 19                      | 13                      | 14                      | 0.0134   |
| 3                     | 205                      | 41                      | 81                      | 83                      |          |

sd: standard deviation
