# Supplementary material for: Identification of three subtypes of triple-negative breast cancer with potential therapeutic implications
Source: Springer Nature journal article supplement (doi:10.1186/s13058-019-1148-6), 2019-05-17
Supplement: MOESM19 [file 16732066]

**Additional file 19: Comparison of clinicopathologic characteristics of TNBC cohorts in function of clusters.** Internal (C1,  $n = 55$ ; C2,  $n = 98$ ; C3,  $n = 85$ ) and external (C'1,  $n = 61$ ; C'2,  $n = 97$ ; C'3,  $n = 99$ ).

| <b>Characteristic</b>      |           | <b>Internal cohort</b> | <b>External cohort</b> | <b><i>P</i></b> |
|----------------------------|-----------|------------------------|------------------------|-----------------|
| Age (years; mean $\pm$ sd) |           |                        |                        |                 |
|                            | 1         | 58.4 $\pm$ 11.4        | 59.1 $\pm$ 11.7        | 0.73            |
|                            | 2         | 54.4 $\pm$ 11.8        | 52.0 $\pm$ 12.5        | 0.17            |
|                            | 3         | 52.3 $\pm$ 11.0        | 51.6 $\pm$ 11.4        | 0.69            |
| SBR grade                  |           |                        |                        |                 |
|                            | 1: 1 or 2 | 18                     | 19                     | 1.00            |
|                            | 3         | 37                     | 41                     |                 |
|                            | 2: 1 or 2 | 10                     | 13                     | 0.51            |
|                            | 3         | 88                     | 81                     |                 |
|                            | 3: 1 or 2 | 15                     | 14                     | 0.69            |
|                            | 3         | 70                     | 83                     |                 |

sd: standard deviation
