# Supplementary material for: Identification of three subtypes of triple-negative breast cancer with potential therapeutic implications
Source: Springer Nature journal article supplement (doi:10.1186/s13058-019-1148-6), 2019-05-17
Supplement: MOESM20 [file 16732066]

**Additional file 20: Categorical GES analyses results in function of external TNBC clusters (C'1, C'2 and C'3).**

| GES name    | subtype            | All<br>(n = 257) | C'1<br>(n = 61) | C'2<br>(n = 97) | C'3<br>(n = 99) | P        |
|-------------|--------------------|------------------|-----------------|-----------------|-----------------|----------|
| 4-TNBC      | BLIA               | 109              | 15              | 19              | 75              | < 0.0001 |
|             | BLIS               | 101              | 4               | 76              | 21              |          |
|             | LAR                | 18               | 18              | 0               | 0               |          |
|             | MES                | 18               | 13              | 2               | 3               |          |
|             | Unclassified       | 11               | 11              | 0               | 0               |          |
| CIT         | Basal-like         | 187              | 5               | 89              | 93              | < 0.0001 |
|             | Luminal A          | 0                | 0               | 0               | 0               |          |
|             | Luminal B          | 1                | 1               | 0               | 0               |          |
|             | Luminal C          | 11               | 11              | 0               | 0               |          |
|             | Molecular-apocrine | 31               | 31              | 0               | 0               |          |
|             | Normal             | 7                | 4               | 3               | 0               |          |
|             | Unclassified       | 20               | 9               | 5               | 6               |          |
| Claudin-low | Claudin-low        | 12               | 3               | 2               | 7               | 0.2259   |
|             | Other              | 245              | 58              | 95              | 92              |          |
|             | ER-negative        | 67               | 7               | 47              | 13              |          |
| CC+         | 125                | 7                | 42              | 76              |                 |          |
| CC+/IR+     | 25                 | 14               | 8               | 3               |                 |          |
| IR+         | 16                 | 9                | 0               | 7               |                 |          |
| SR+         | 22                 | 22               | 0               | 0               |                 |          |
| PAM50       | Unclassified       | 2                | 2               | 0               | 0               | < 0.0001 |
|             | Basal-like         | 198              | 14              | 89              | 95              |          |
|             | HER2-E             | 30               | 29              | 0               | 1               |          |
|             | Luminal A          | 8                | 8               | 0               | 0               |          |
|             | Luminal B          | 4                | 4               | 0               | 0               |          |
|             | NBL                | 17               | 6               | 8               | 3               |          |
| TNBCtype    | Unclassified       | 0                | 0               | 0               | 0               | < 0.0001 |
|             | BL1                | 43               | 0               | 26              | 17              |          |
|             | BL2                | 26               | 8               | 5               | 13              |          |
|             | IM                 | 49               | 2               | 2               | 45              |          |
|             | LAR                | 36               | 35              | 0               | 1               |          |
|             | M                  | 39               | 1               | 37              | 1               |          |
|             | MSL                | 19               | 8               | 8               | 3               |          |
|             | Unclassified       | 45               | 7               | 19              | 19              |          |

GES: gene-expression signature; BLIA: basal-like immune activated; BLIS: basal-like immune suppressed ; LAR: luminal androgen receptor; MES: mesenchymal; CIT: tumor identity card; CC+: cell cycle; CC+/IR+: cell cycle and immune response; ECM+: extracellular matrix; IR+: immune response; SR+: steroid hormone response; NBL: normal breast-like; BL1: basal-like 1; BL2: basal-like 2; IM: immunomodulatory; M: mesenchymal-like; MSL: mesenchymal stem-like.
