# Supplementary material for: Identification of three subtypes of triple-negative breast cancer with potential therapeutic implications
Source: Springer Nature journal article supplement (doi:10.1186/s13058-019-1148-6), 2019-05-17
Supplement: MOESM21 [file 16732066]

**Additional file 21: Continuous score GES analyses results in function of external TNBC clusters (C'1, C'2 and C'3).**

| GES name                                      | P        | P          |            |            | Results                            |
|-----------------------------------------------|----------|------------|------------|------------|------------------------------------|
|                                               |          | C'1 vs C'2 | C'1 vs C'3 | C'2 vs C'3 |                                    |
| <b>Molecular subtyping</b>                    |          |            |            |            |                                    |
| AR                                            | < 0.0001 | < 0.0001   | < 0.0001   | 0.2924     | C'1 > C'2 ≈ C'3                    |
| Basal-like                                    | < 0.0001 | < 0.0001   | < 0.0001   | < 0.0001   | C'1 < C'3 < C'2                    |
| Claudin-CD24                                  | 0.2730   |            |            |            | NS                                 |
| ER                                            | < 0.0001 | < 0.0001   | < 0.0001   | 0.8448     | C'1 > C'2 ≈ C'3                    |
| ERBB2                                         | < 0.0001 | < 0.0001   | < 0.0001   | 0.8803     | C'1 > C'2 ≈ C'3                    |
| Molecular-apocrine                            | < 0.0001 | < 0.0001   | < 0.0001   | 0.8759     | C'1 > C'2 ≈ C'3                    |
| <b>Immune response</b>                        |          |            |            |            |                                    |
| B-cell                                        | < 0.0001 | 0.0280     | < 0.0001   | < 0.0001   | C'2 < C'1 < C'3                    |
| CYT                                           | < 0.0001 | 0.5195     | < 0.0001   | < 0.0001   | C'1 ≈ C'2 < C'3                    |
| IL-8                                          | 0.0434   | 0.3053     | 0.0331     | 0.4638     | C'1 < C'3, C'1 ≈ C'2 and C'2 ≈ C'3 |
| M2/M1                                         | < 0.0001 | 0.1559     | < 0.0001   | < 0.0001   | C'1 ≈ C'2 > C'3                    |
| M2/M1 (Becker)                                | < 0.0001 | 0.3478     | < 0.0001   | < 0.0001   | C'1 ≈ C'2 > C'3                    |
| MHC-1                                         | < 0.0001 | 0.9380     | < 0.0001   | < 0.0001   | C'1 ≈ C'2 < C'3                    |
| MHC-2                                         | < 0.0001 | 0.0026     | < 0.0001   | < 0.0001   | C'2 < C'1 < C'3                    |
| STAT1                                         | < 0.0001 | 0.9361     | < 0.0001   | < 0.0001   | C'1 ≈ C'2 < C'3                    |
| T-cell                                        | < 0.0001 | 0.0217     | < 0.0001   | < 0.0001   | C'2 < C'1 < C'3                    |
| Type I IFN                                    | < 0.0001 | 0.4534     | < 0.0001   | < 0.0001   | C'1 ≈ C'2 < C'3                    |
| <b>Microenvironment cells</b>                 |          |            |            |            |                                    |
| Epithelial cells                              | 0.1900   |            |            |            | NS                                 |
| Fibroblasts                                   | 0.0077   | 0.5336     | 0.0085     | 0.0753     | C'1 > C'3, C'1 ≈ C'2 and C'2 ≈ C'3 |
| Neurons                                       | 0.0008   | 0.9737     | 0.0121     | 0.0014     | C'1 ≈ C'2 > C'3                    |
| <b>Metabolism</b>                             |          |            |            |            |                                    |
| Adipocytes                                    | 0.1683   |            |            |            | NS                                 |
| Glycolysis                                    | 0.0169   | 0.0628     | 0.0153     | 0.8225     | C'1 < C'3, C'1 ≈ C'2 and C'2 ≈ C'3 |
| IRGS                                          | < 0.0001 | < 0.0001   | < 0.0001   | 0.8684     | C'1 < C'2 ≈ C'3                    |
| <b>Critical biological pathways in cancer</b> |          |            |            |            |                                    |
| AKT                                           | 0.2110   |            |            |            | NS                                 |
| β-Catenin                                     | 0.1171   |            |            |            | NS                                 |
| CIN                                           | < 0.0001 | < 0.0001   | < 0.0001   | 0.9767     | C'1 < C'2 ≈ C'3                    |
| E2F3                                          | 0.0014   | 0.0082     | 0.9831     | 0.0039     | C'1 ≈ C'3 < C'2                    |
| EGFR                                          | < 0.0001 | < 0.0001   | < 0.0001   | 0.4994     | C'1 < C'2 ≈ C'3                    |
| HOXA                                          | 0.0001   | 0.0231     | < 0.0001   | 0.1015     | C'1 > C'2 ≈ C'3                    |
| MITO/OXPHOS                                   | 0.1581   |            |            |            | NS                                 |
| MYC                                           | < 0.0001 | < 0.0001   | < 0.0001   | 0.4907     | C'1 < C'2 ≈ C'3                    |
| p53                                           | < 0.0001 | < 0.0001   | < 0.0001   | 0.0697     | C'1 > C'2 ≈ C'3                    |
| PIK3CA                                        | < 0.0001 | < 0.0001   | < 0.0001   | < 0.0001   | C'1 < C'3 < C'2                    |
| PNI                                           | 0.0002   | 0.0005     | 0.5177     | 0.0052     | C'1 ≈ C'3 < C'2                    |
| PRL                                           | < 0.0001 | < 0.0001   | 0.0027     | 0.2571     | C'1 > C'2 ≈ C'3                    |
| Proliferation                                 | < 0.0001 | < 0.0001   | < 0.0001   | 0.8548     | C'1 < C'2 ≈ C'3                    |
| PTEN loss                                     | < 0.0001 | < 0.0001   | < 0.0001   | 0.9473     | C'1 < C'2 ≈ C'3                    |
| RAS                                           | 0.0016   | 0.1729     | 0.3544     | 0.001      | C'2 < C'3, C'1 ≈ C'2 and C'1 ≈ C'3 |
| Reactive stroma                               | < 0.0001 | < 0.0001   | < 0.0001   | 0.3142     | C'1 > C'2 ≈ C'3                    |
| SRC                                           | 0.0001   | 0.0682     | < 0.0001   | 0.0519     | C'1 < C'3, C'1 ≈ C'2 and C'2 ≈ C'3 |
| Stroma-CD10                                   | < 0.0001 | < 0.0001   | < 0.0001   | 0.8734     | C'1 > C'2 ≈ C'3                    |
| TGFβ                                          | 0.0507   |            |            |            | NS                                 |
| VEGF                                          | 0.0130   | 0.1321     | 0.8256     | 0.0119     | C'2 > C'3, C'1 ≈ C'2 and C'1 ≈ C'3 |
| Wound-response                                | < 0.0001 | < 0.0001   | < 0.0001   | 0.7747     | C'1 < C'2 ≈ C'3                    |
| YAP1-WWTR1                                    | 0.9617   |            |            |            | NS                                 |
| <b>Prognosis</b>                              |          |            |            |            |                                    |
| 38-GES                                        | < 0.0001 | < 0.0001   | < 0.0001   | 0.1054     | C'1 < C'2 ≈ C'3                    |
| 70-GES                                        | < 0.0001 | < 0.0001   | < 0.0001   | 0.0391     | C'1 < C'3 < C'2                    |
| GGI                                           | < 0.0001 | < 0.0001   | < 0.0001   | 0.5274     | C'1 < C'2 ≈ C'3                    |

GES: gene-expression signature; NS: not significant (p > 0.05).
