# Supplementary material for: Identification of three subtypes of triple-negative breast cancer with potential therapeutic implications
Source: Springer Nature journal article supplement (doi:10.1186/s13058-019-1148-6), 2019-05-17
Supplement: MOESM22 [file 16732066]

**Additional file 22: C'2 vs C'3 CIBERSORT analysis results.**

| <b>Immune cells</b>          | <b>Tumorigenic effect in breast cancer<sup>a</sup></b> | <b><i>P</i></b> | <b>C'2 vs C'3 differential expression</b> |
|------------------------------|--------------------------------------------------------|-----------------|-------------------------------------------|
| B cells memory               | Pro-tumorigenic                                        | 0.0825          | C'2 ≈ C'3                                 |
| B cells naïve                | No effect                                              | 0.4607          | C'2 ≈ C'3                                 |
| Dendritic cells activated    | Anti-tumorigenic                                       | 0.4391          | C'2 ≈ C'3                                 |
| Dendritic cells resting      | Pro-tumorigenic                                        | 0.9313          | C'2 ≈ C'3                                 |
| Eosinophils                  | Pro-tumorigenic                                        | 0.2689          | C'2 ≈ C'3                                 |
| Macrophages M0               | Pro-tumorigenic                                        | < 0.0001        | C'2 > C'3                                 |
| Macrophages M1               | Pro-tumorigenic                                        | 0.0140          | C'2 < C'3                                 |
| Macrophages M2               | Pro-tumorigenic                                        | 0.1686          | C'2 ≈ C'3                                 |
| Mast cells activated         | Pro-tumorigenic                                        | 0.0075          | C'2 > C'3                                 |
| Mast cells resting           | Anti-tumorigenic                                       | 0.3859          | C'2 ≈ C'3                                 |
| Monocytes                    | Pro-tumorigenic                                        | 0.4888          | C'2 ≈ C'3                                 |
| Neutrophils                  | Pro-tumorigenic                                        | 0.9263          | C'2 ≈ C'3                                 |
| NK cells activated           | Anti-tumorigenic                                       | 0.3807          | C'2 ≈ C'3                                 |
| NK cells resting             | Pro-tumorigenic                                        | 0.1304          | C'2 ≈ C'3                                 |
| Plasma cells                 | Anti-tumorigenic                                       | 0.0097          | C'2 < C'3                                 |
| T cells CD4 memory activated | Anti-tumorigenic                                       | < 0.0001        | C'2 < C'3                                 |
| T cells CD4 memory resting   | Pro-tumorigenic                                        | 0.0346          | C'2 > C'3                                 |
| T cells CD4 naïve            | Anti-tumorigenic                                       | 0.3192          | C'2 ≈ C'3                                 |
| T cells CD8                  | Anti-tumorigenic                                       | < 0.0001        | C'2 < C'3                                 |
| T cells follicular helper    | Anti-tumorigenic                                       | 0.9388          | C'2 ≈ C'3                                 |
| T cells gamma delta          | Anti-tumorigenic                                       | 0.2758          | C'2 ≈ C'3                                 |
| T cells regulatory           | Anti-tumorigenic                                       | 0.2276          | C'2 ≈ C'3                                 |

a: based on results from Gentles et al [21] except for macrophages M1 [22]
