# Supplementary material for: Identification of three subtypes of triple-negative breast cancer with potential therapeutic implications
Source: Springer Nature journal article supplement (doi:10.1186/s13058-019-1148-6), 2019-05-17

**Additional file 23: Biological gradients between C2 and C3 in external cohort.** Correlation coefficient calculation between GES score for each external cohort tumor (x number), and C'2 and C'3 cluster probability orthogonal projection on C'2-C'3 axis (y number) (C'2 tumor, red; C'3 tumor, green). Only correlation coefficient absolute values superior to 0.5 ( $P < 0.0001$ ) are displayed.

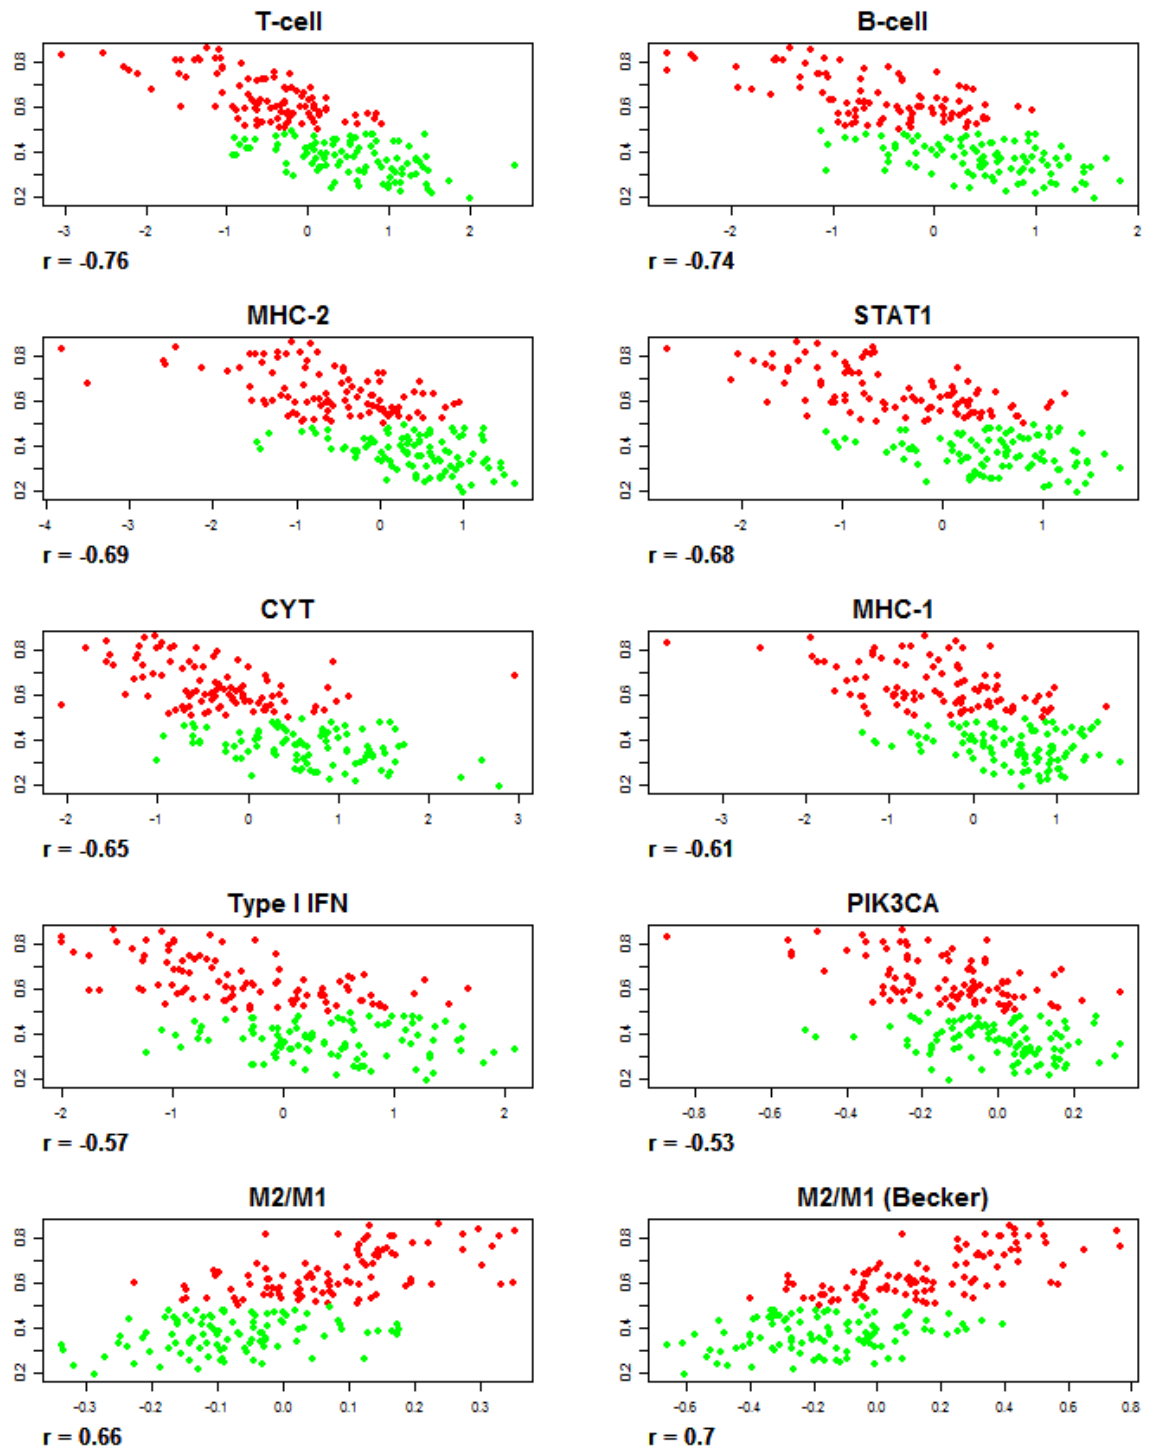

Supplement: MOESM23 [file 16732066]
