# Supplementary material for: Identification of three subtypes of triple-negative breast cancer with potential therapeutic implications
Source: Springer Nature journal article supplement (doi:10.1186/s13058-019-1148-6), 2019-05-17

**Additional file 24: PCA result representation of external TNBC and non-TNBC data.**

PCA is computed based on the TNBC data and the values of the two first principal components (PC1 and PC2) are then predicted for the non-TNBC data. All patients are then projected onto the plane generated by PC1 and PC2. Ellipses represent the 95% confidence of belonging to the clusters data (C'1,  $n = 61$  [blue]; C'2,  $n = 97$  [red] and C'3,  $n = 99$  [green]). External non-TNBC data ( $n = 894$ ) are figured by black points.

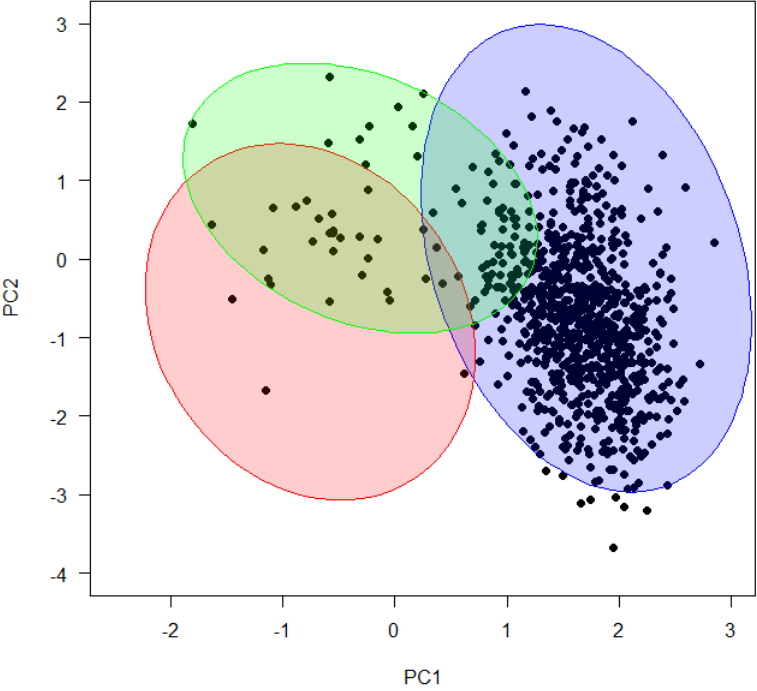

Supplement: MOESM24 [file 16732066]
