# Supplementary material for: Identification of three subtypes of triple-negative breast cancer with potential therapeutic implications
Source: Springer Nature journal article supplement (doi:10.1186/s13058-019-1148-6), 2019-05-17
Supplement: MOESM25 [file 16732066]

**Additional file 25: Categorical GES analyses interpretation in function of external TNBC (C'1, C'2, C'3) and non-TNBC clusters (NTN).**

| GES name    | subtype            | All<br>(n = 1151) | NTN<br>(n = 894) | C'1<br>(n = 61) | C'2<br>(n = 97) | C'3<br>(n = 99) | P        |
|-------------|--------------------|-------------------|------------------|-----------------|-----------------|-----------------|----------|
| 4-TNBC      | BLIA               | 109               |                  | 15              | 19              | 75              | < 0.0001 |
|             | BLIS               | 101               |                  | 4               | 76              | 21              |          |
|             | LAR                | 18                |                  | 18              | 0               | 0               |          |
|             | MES                | 18                |                  | 13              | 2               | 3               |          |
|             | Unclassified       | 11                |                  | 11              | 0               | 0               |          |
| CIT         | Basal-like         | 225               | 38               | 5               | 89              | 93              | < 0.0001 |
|             | Luminal A          | 148               | 148              | 0               | 0               | 0               |          |
|             | Luminal B          | 165               | 164              | 1               | 0               | 0               |          |
|             | Luminal C          | 142               | 131              | 11              | 0               | 0               |          |
|             | Molecular-apocrine | 96                | 65               | 31              | 0               | 0               |          |
|             | Normal             | 192               | 185              | 4               | 3               | 0               |          |
|             | Unclassified       | 183               | 163              | 9               | 5               | 6               |          |
| Claudin-low | Claudin-low        | 12                |                  | 3               | 2               | 7               | 0.2259   |
|             | Other              | 245               |                  | 58              | 95              | 92              |          |
| ER-negative | CC+                | 156               | 89               | 7               | 47              | 13              | < 0.0001 |
|             | CC+/IR+            | 230               | 105              | 7               | 42              | 76              |          |
|             | ECM+               | 301               | 276              | 14              | 8               | 3               |          |
|             | IR+                | 151               | 135              | 9               | 0               | 7               |          |
|             | SR+                | 266               | 245              | 22              | 0               | 0               |          |
| PAM50       | Unclassified       | 47                | 45               | 2               | 0               | 0               | < 0.0001 |
|             | Basal-like         | 278               | 80               | 14              | 89              | 95              |          |
|             | HER2-E             | 165               | 135              | 29              | 0               | 1               |          |
|             | Luminal A          | 394               | 386              | 8               | 0               | 0               |          |
|             | Luminal B          | 215               | 211              | 4               | 0               | 0               |          |
|             | NBL                | 92                | 75               | 6               | 8               | 3               |          |
| TNBCtype    | Unclassified       | 7                 | 7                | 0               | 0               | 0               | < 0.0001 |
|             | BL1                | 43                |                  | 0               | 26              | 17              |          |
|             | BL2                | 26                |                  | 8               | 5               | 13              |          |
|             | IM                 | 49                |                  | 2               | 2               | 45              |          |
|             | LAR                | 36                |                  | 35              | 0               | 1               |          |
|             | M                  | 39                |                  | 1               | 37              | 1               |          |
|             | MSL                | 19                |                  | 8               | 8               | 3               |          |
|             | Unclassified       | 45                |                  | 7               | 19              | 19              |          |

GES: gene-expression signature; BLIA: basal-like immune activated; BLIS: basal-like immune suppressed ; LAR: luminal androgen receptor; MES: mesenchymal; CIT: tumor identity card; CC+: cell cycle; CC+/IR+: cell cycle and immune response; ECM+: extracellular matrix; IR+: immune response; SR+: steroid hormone response; NBL: normal breast-like; BL1: basal-like 1; BL2: basal-like 2; IM: immunomodulatory; M: mesenchymal-like; MSL: mesenchymal stem-like.
