# Supplementary material for: Identification of three subtypes of triple-negative breast cancer with potential therapeutic implications
Source: Springer Nature journal article supplement (doi:10.1186/s13058-019-1148-6), 2019-05-17
Supplement: MOESM26 [file 16732066]

**Additional file 26: Continuous score GES analyses results in function of external TNBC (C'1, C'2, C'3) and non-TNBC clusters (NTN).**

| GES name                                      | P        | P          |            |            |            |            |            | Results                                        |
|-----------------------------------------------|----------|------------|------------|------------|------------|------------|------------|------------------------------------------------|
|                                               |          | NTN vs C'1 | NTN vs C'2 | NTN vs C'3 | C'1 vs C'2 | C'1 vs C'3 | C'2 vs C'3 |                                                |
| <b>Molecular subtyping</b>                    |          |            |            |            |            |            |            |                                                |
| AR                                            | < 0.0001 | 0.5261     | < 0.0001   | < 0.0001   | < 0.0001   | < 0.0001   | 0.4192     | NTN ≈ C'1 > C'2 ≈ C'3                          |
| Basal-like                                    | < 0.0001 | 0.7887     | < 0.0001   | < 0.0001   | < 0.0001   | < 0.0001   | < 0.0001   | NTN ≈ C'1 < C'3 < C'2                          |
| Claudin-CD24                                  | 0.0428   | 0.8129     | 0.9223     | 0.0460     | 0.6719     | 0.0751     | 0.4628     | NTN > C'3, NTN ≈ C'1 ≈ C'2 and C'1 ≈ C'2 ≈ C'3 |
| ER                                            | < 0.0001 | < 0.0001   | < 0.0001   | < 0.0001   | < 0.0001   | < 0.0001   | 0.9994     | NTN > C'1 > C'2 ≈ C'3                          |
| ERBB2                                         | < 0.0001 | 0.9015     | < 0.0001   | < 0.0001   | < 0.0001   | < 0.0001   | 0.9988     | NTN ≈ C'1 > C'2 ≈ C'3                          |
| Molecular-apocrine                            | < 0.0001 | 0.2860     | 0.0117     | < 0.0001   | 0.0031     | < 0.0001   | < 0.0001   | C'1 > NTN > C'2 ≈ C'3                          |
| <b>Immune response</b>                        |          |            |            |            |            |            |            |                                                |
| B-cell                                        | < 0.0001 | 0.3858     | 0.1987     | < 0.0001   | 0.0495     | < 0.0001   | < 0.0001   | C'3 > C'1 > C'2, NTN ≈ C'2 < C'3 and NTN ≈ C'1 |
| CYT                                           | < 0.0001 | 0.7898     | 0.8523     | < 0.0001   | 0.5772     | < 0.0001   | < 0.0001   | NTN ≈ C'1 ≈ C'2 < C'3                          |
| IL-8                                          | < 0.0001 | 0.0006     | < 0.0001   | < 0.0001   | 0.6170     | 0.1143     | 0.6544     | NTN < C'1 ≈ C'2 ≈ C'3                          |
| M2/M1                                         | < 0.0001 | 0.0146     | 0.9985     | < 0.0001   | 0.0932     | < 0.0001   | < 0.0001   | C'1 ≈ C'2 > C'3, NTN > C'1 > C'3 and NTN ≈ C'2 |
| M2/M1 (Becker)                                | < 0.0001 | 0.4919     | 0.8117     | < 0.0001   | 0.3117     | < 0.0001   | < 0.0001   | NTN ≈ C'1 ≈ C'2 > C'3                          |
| MHC-1                                         | < 0.0001 | 0.9050     | 0.9917     | < 0.0001   | 0.9838     | < 0.0001   | < 0.0001   | NTN ≈ C'1 ≈ C'2 < C'3                          |
| MHC-2                                         | < 0.0001 | 0.8756     | < 0.0001   | < 0.0001   | 0.0016     | 0.0001     | < 0.0001   | C'3 > NTN ≈ C'1 > C'2                          |
| STAT1                                         | < 0.0001 | 0.3643     | 0.6263     | < 0.0001   | 0.9515     | < 0.0001   | < 0.0001   | NTN ≈ C'1 ≈ C'2 < C'3                          |
| T-cell                                        | < 0.0001 | 0.6182     | 0.0161     | < 0.0001   | 0.0184     | < 0.0001   | < 0.0001   | C'3 > NTN ≈ C'1 > C'2                          |
| Type I IFN                                    | < 0.0001 | 1.0000     | 0.3096     | < 0.0001   | 0.6751     | < 0.0001   | < 0.0001   | NTN ≈ C'1 ≈ C'2 < C'3                          |
| <b>Microenvironment cells</b>                 |          |            |            |            |            |            |            |                                                |
| Epithelial cells                              | 0.1773   |            |            |            |            |            |            | NS                                             |
| Fibroblasts                                   | < 0.0001 | 0.0449     | < 0.0001   | < 0.0001   | 0.5437     | 0.0045     | 0.0978     | NTN > C'1 > C'3, NTN > C'2 ≈ C'3 and C'1 ≈ C'2 |
| Neurons                                       | 0.0001   | 0.7117     | 0.3491     | 0.0005     | 0.9962     | 0.0034     | 0.0002     | NTN ≈ C'1 ≈ C'2 > C'3                          |
| <b>Metabolism</b>                             |          |            |            |            |            |            |            |                                                |
| Adipocytes                                    | < 0.0001 | 0.8846     | 0.0128     | 0.0004     | 0.5005     | 0.1808     | 0.8960     | NTN > C'2 ≈ C'3, NTN ≈ C'1 and C'1 ≈ C'2 ≈ C'3 |
| Glycolysis                                    | < 0.0001 | < 0.0001   | < 0.0001   | < 0.0001   | 0.1972     | 0.0749     | 0.9614     | NTN < C'1 ≈ C'2 ≈ C'3                          |
| IRGS                                          | < 0.0001 | 0.9835     | < 0.0001   | < 0.0001   | < 0.0001   | < 0.0001   | 0.9680     | NTN ≈ C'1 < C'2 ≈ C'3                          |
| <b>Critical biological pathways in cancer</b> |          |            |            |            |            |            |            |                                                |
| AKT                                           | < 0.0001 | 0.5039     | 0.0006     | < 0.0001   | 0.4897     | 0.2397     | 0.9552     | NTN < C'2 ≈ C'3, NTN ≈ C'1 and C'1 ≈ C'2 ≈ C'3 |
| β-Catenin                                     | 0.0976   |            |            |            |            |            |            | NS                                             |
| CIN                                           | < 0.0001 | 0.5034     | < 0.0001   | < 0.0001   | < 0.0001   | < 0.0001   | 0.9992     | NTN ≈ C'1 < C'2 ≈ C'3                          |
| E2F3                                          | < 0.0001 | 0.9770     | < 0.0001   | 0.4876     | 0.0004     | 0.9346     | 0.0007     | NTN ≈ C'1 ≈ C'3 < C'2                          |
| EGFR                                          | < 0.0001 | 0.0272     | < 0.0001   | < 0.0001   | < 0.0001   | < 0.0001   | 0.6211     | NTN < C'1 < C'2 ≈ C'3                          |
| HOXA                                          | < 0.0001 | < 0.0001   | 0.0631     | 0.7829     | 0.0044     | < 0.0001   | 0.0523     | NTN ≈ C'2 ≈ C'3 < C'1                          |
| MITO/OXPHOS                                   | 0.1304   |            |            |            |            |            |            | NS                                             |
| MYC                                           | < 0.0001 | 0.9606     | < 0.0001   | < 0.0001   | < 0.0001   | < 0.0001   | 0.6805     | NTN ≈ C'1 < C'2 ≈ C'3                          |
| p53                                           | < 0.0001 | < 0.0001   | < 0.0001   | < 0.0001   | < 0.0001   | < 0.0001   | 0.5453     | NTN > C'1 > C'2 ≈ C'3                          |
| PIK3CA                                        | < 0.0001 | 0.3418     | < 0.0001   | < 0.0001   | < 0.0001   | 0.0002     | 0.0008     | NTN ≈ C'1 > C'3 > C'2                          |
| PNI                                           | < 0.0001 | 0.6786     | < 0.0001   | 0.4394     | < 0.0001   | 0.2358     | 0.0042     | NTN ≈ C'1 ≈ C'3 < C'2                          |
| PRL                                           | < 0.0001 | 0.9976     | < 0.0001   | < 0.0001   | 0.0002     | 0.0144     | 0.5391     | NTN ≈ C'1 > C'2 ≈ C'3                          |
| Proliferation                                 | < 0.0001 | 0.3042     | < 0.0001   | < 0.0001   | < 0.0001   | < 0.0001   | 0.9761     | NTN ≈ C'1 < C'2 ≈ C'3                          |
| PTEN loss                                     | < 0.0001 | 0.9999     | < 0.0001   | < 0.0001   | < 0.0001   | < 0.0001   | 0.9763     | NTN ≈ C'1 < C'2 ≈ C'3                          |
| RAS                                           | < 0.0001 | < 0.0001   | 0.0027     | < 0.0001   | 0.1447     | 0.6591     | 0.0011     | NTN < C'2 < C'3, NTN < C'1 ≈ C'2 and C'1 ≈ C'3 |
| Reactive stroma                               | < 0.0001 | 0.3017     | < 0.0001   | < 0.0001   | < 0.0001   | < 0.0001   | 0.4652     | NTN ≈ C'1 > C'2 ≈ C'3                          |
| SRC                                           | 0.0003   | 0.1305     | 0.9515     | 0.0023     | 0.1506     | 0.0003     | 0.1153     | NTN ≈ C'1 < C'3, NTN ≈ C'1 ≈ C'2 and C'2 ≈ C'3 |
| Stroma-CD10                                   | < 0.0001 | 0.8668     | < 0.0001   | < 0.0001   | < 0.0001   | < 0.0001   | 0.9410     | NTN ≈ C'1 > C'2 ≈ C'3                          |
| TGFβ                                          | < 0.0001 | < 0.0001   | < 0.0001   | < 0.0001   | 0.9616     | 0.5604     | 0.1722     | NTN < C'1 ≈ C'2 ≈ C'3                          |
| VEGF                                          | < 0.0001 | < 0.0001   | < 0.0001   | < 0.0001   | 0.1496     | 0.7079     | 0.0016     | NTN < C'3 < C'2, NTN < C'1 ≈ C'2 and C'1 ≈ C'3 |
| Wound-response                                | < 0.0001 | 0.9446     | < 0.0001   | < 0.0001   | < 0.0001   | < 0.0001   | 0.9039     | NTN ≈ C'1 < C'2 ≈ C'3                          |
| YAP1-WWTR1                                    | NS       |            |            |            |            |            |            | NS                                             |
| <b>Prognosis</b>                              |          |            |            |            |            |            |            |                                                |
| 38-GES                                        | < 0.0001 | < 0.0001   | < 0.0001   | < 0.0001   | < 0.0001   | < 0.0001   | 0.2937     | NTN < C'1 < C'2 ≈ C'3                          |
| 70-GES                                        | < 0.0001 | < 0.0001   | < 0.0001   | < 0.0001   | < 0.0001   | < 0.0001   | 0.7985     | NTN < C'1 < C'2 ≈ C'3                          |
| GGI                                           | < 0.0001 | 0.0373     | < 0.0001   | < 0.0001   | < 0.0001   | < 0.0001   | 0.8691     | NTN < C'1 < C'2 ≈ C'3                          |

GES: gene-expression signature; NS: not significant ( $P > 0.05$ ).
