# Supplementary material for: Identification of three subtypes of triple-negative breast cancer with potential therapeutic implications
Source: Springer Nature journal article supplement (doi:10.1186/s13058-019-1148-6), 2019-05-17

**Additional file 27: Categorical GES distributions in function of external TNBC (C'1, C'2, C'3) and non-TNBC clusters (NTN). (A) CIT, (B) ER-negative and (C) PAM50.**

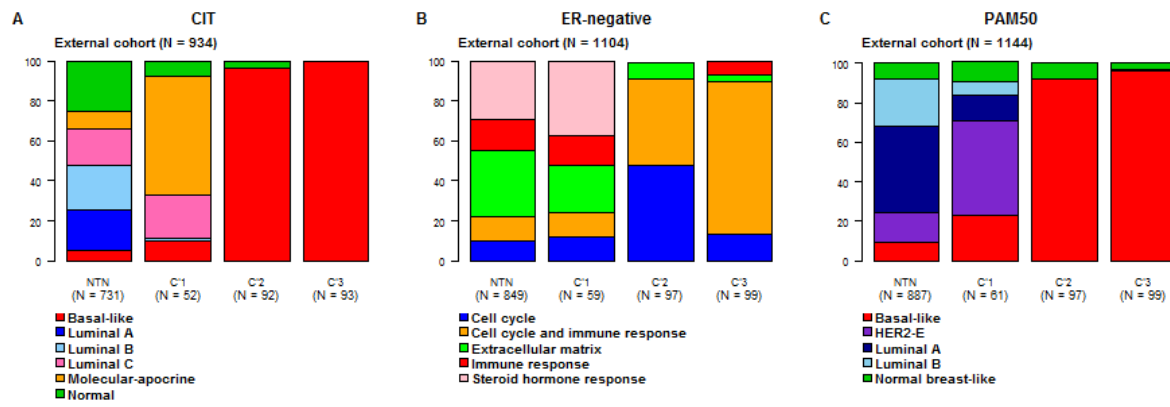

Supplement: MOESM27 [file 16732066]
