# Supplementary material for: Identification of three subtypes of triple-negative breast cancer with potential therapeutic implications
Source: Springer Nature journal article supplement (doi:10.1186/s13058-019-1148-6), 2019-05-17
Supplement: MOESM29 [file 16732066]

**Additional file 29: Proposed therapeutic strategies in function of GES and robust subtyping results.**

| Subtyping result | GES name             | Proposed therapeutic strategy                         | Reference  |
|------------------|----------------------|-------------------------------------------------------|------------|
| C1               | AR                   | Antiandrogens                                         | (S45)      |
|                  | ERBB2                | Dual anti-HER2 therapeutic approach                   | (S46, S47) |
|                  | Molecular apocrine   | Antiandrogens                                         | (S45)      |
|                  | PIK3CA               | PIK3 inhibitors + antiandrogens                       | (S48)      |
| C2 and C3        | PRL                  | Anti-prolactin                                        | (S49)      |
|                  | p53                  | p53 restoration                                       | (S50)      |
|                  | CIN                  | Centrosome amplification inhibition                   | (S51)      |
|                  | EGFR                 | EGFR inhibitors                                       | (S52)      |
|                  | IRGS                 | Iron depletion                                        | (S53)      |
|                  | MYC                  | MYC pathway inhibition                                | (S54, S55) |
|                  | PTEN loss            | PTEN loss restoration                                 | (S56, S57) |
|                  | CIBERSORT            | Immunosuppression reversion                           | (S58)      |
| C2               | E2F3                 | E2F3 inhibitors                                       | (S59)      |
|                  | PNI                  | Perineural invasion inhibitors                        | (S60)      |
|                  | M2/M1                | TAM-focused therapeutic strategies                    | (S61)      |
|                  | Neurons/Axonogenesis | Antineurogenic therapies, nerve dependence inhibitors | (S62-S64)  |
|                  | VEGF                 | Antiangiogenesis                                      | (S65)      |
| C3               | B-cell               | Stimulation of adaptive immune response               | (S58)      |
|                  | CIBERSORT            | Stimulation of adaptive immune response               | (S58)      |
|                  | CYT                  | Stimulation of adaptive immune response               | (S58)      |
|                  | MHC-1                | Stimulation of adaptive immune response               | (S58)      |
|                  | MHC-2                | Stimulation of adaptive immune response               | (S58)      |
|                  | STAT1                | Stimulation of adaptive immune response               | (S58)      |
|                  | T-cell               | Stimulation of adaptive immune response               | (S58)      |
|                  | Type I IFN           | Stimulation of adaptive immune response               | (S58)      |

**References**

- S45. Ni M, Chen Y, Lim E, Wimberly H, Bailey ST, Imai Y et al. Targeting androgen receptor in estrogen receptor-negative breast cancer. *Cancer Cell*. 2011;20:119-31.
- S46. Konecny GE. Emerging strategies for the dual inhibition of HER2-positive breast cancer. *Curr Opin Obstet Gynecol*. 2013;25:55-65.
- S47. Vranic S, Schmitt F, Sapino A, Costa JL, Reddy S, Castro M et al. Apocrine carcinoma of the breast: a comprehensive review. *Histol Histopathol*. 2013;28:1393-409.
- S48. Lehmann BD, Bauer JA, Schafer JM, Pendleton CS, Tang L, Johnson KC et al. PIK3CA mutations in androgen receptor-positive triple negative breast cancer confer sensitivity to the combination of PI3K and androgen receptor inhibitors. *Breast Cancer Res*. 2014;16:406.
- S49. Kelly MP, Hickey C, Makonnen S, Coetzee S, Jalal S, Wang Y et al. Preclinical activity of the novel anti-prolactin receptor (PRLR) antibody-drug conjugate REGN2878-DM1 in PRLR-positive breast cancers. *Mol Cancer Ther*. 2017;16:1299-311.
- S50. Zawacka-Pankau J, Selivanova G. Pharmacological reactivation of p53 as a strategy to treat cancer. *J Intern Med*. 2015;277:248-59.
- S51. Leontovich AA, Salisbury JL, Veroux M, Tallarita T, Billadeau D, McCubrey J et al. Inhibition of Cdk2 activity decreases Aurora-A kinase centrosomal localization and prevents centrosome amplification in breast cancer cells. *Oncol Rep*. 2013;29:1785-88.
- S52. Nakai K, Hung MC, Yamaguchi H. A perspective on anti-EGFR therapies targeting triple-negative breast cancer. *Am J Cancer Res*. 2016;6:1609-23.
- S53. Torti SV, Torti FM. Cellular iron metabolism in prognosis and therapy of breast cancer. *Crit Rev Oncog*. 2013;18:435-48.
- S54. Horiuchi D, Camarda R, Zhou AY, Yau C, Momcilovic O, Balakrishnan S et al. PIM1 kinase inhibition as a targeted therapy against triple-negative breast tumors with elevated MYC expression. *Nat Med*. 2016;22:1321-9.

- S55. Fallah Y, Brundage J, Allegakoen P, Shajahan-Haq AN. MYC-driven pathways in breast cancer subtypes. *Biomolecules*. 2017;7(3).
- S56. Ebbesen SH, Scaltriti M, Bialucha CU, Morse N, Kasthuber ER, Wen HY et al. Pten loss promotes MAPK pathway dependency in HER2/neu breast carcinomas. *Proc Natl Acad Sci USA*. 2016;113:3030-5.
- S57. Dillon LM, Miller TW. Therapeutic targeting of cancers with loss of PTEN function. *Curr Drug Targets*. 2014;15:65-79.
- S58. Di Caro G, Castino GF, Bergomas F, Cortese N, Chiriva-Internati M, Grizzi F et al. Tertiary lymphoid tissue in the tumor microenvironment: from its occurrence to immunotherapeutic implications. *Int Rev Immunol*. 2015;34:123-33.
- S59. Lee M, Oprea-Illies G, Saavedra HI. Silencing of E2F3 suppresses tumor growth of Her2+ breast cancer cells by restricting mitosis. *Oncotarget*. 2015;6:37316-34.
- S60. Amit M, Na'ara S, Gil Z. Mechanisms of cancer dissemination along nerves. *Nat Rev Cancer*. 2016;16:399-408.
- S61. Mantovani A, Marchesi F, Malesci A, Laghi L, Allavena P. Tumour-associated macrophages as treatment targets in oncology. *Nat Rev Clin Oncol*. 2017;14:399-416.
- S62. Magnon C, Hall SJ, Lin J, Xue X, Gerber L, Freedland SJ et al. Autonomic nerve development contributes to prostate progression. *Science*. 2013;341:1236361.
- S63. Jobling P, Pundavela J, Oliveira SM, Roselli S, Walker MM, Hondermarck H. Nerve-cancer cell cross-talk: a novel promoter of tumor progression. *Cancer Res*. 2015;75:1777-81.
- S64. Boilly B, Faulkner S, Jobling P, Hondermarck H. Nerve dependence: from regeneration to cancer. *Cancer Cell*. 2017;31:342-54.
- S65. Ribatti D, Nico B, Ruggieri S, Tamma R, Simone G, Mangia A. Angiogenesis and antiangiogenesis in triple-negative breast cancer. *Transl Oncol*. 2016;9:453-7.
